# Supplementary material for: Integrated Transcriptomics and Metabolomics Analysis Reveal Key Metabolism Pathways Contributing to Cold Tolerance in Peanut
Source: Front Plant Sci. 2021 Nov 24;12:752474. doi: 10.3389/fpls.2021.752474 (PMC8652294; doi:10.3389/fpls.2021.752474)
Supplement: Supplementary Table 2 — A list of metabolites detected in the samples. [file Table_2.XLSX]

## Sheet: Sheet1
Table S2. List of metabolites detected in the samples. The values were derived from the peak area of the corresponding metabolites in data files generated by HPLC-MS/MS, and represented the relative content of corresponding metabolites. The values can be only compared within the same metabolites between different samples.
name	Name_des	Class(English)	SLH_0h_A	SLH_0h_B	SLH_0h_C	SLH_24h_A	SLH_24h_B	SLH_24h_C	SLH_3h_A	SLH_3h_B	SLH_3h_C	SLH_48h_A	SLH_48h_B	SLH_48h_C	ZH12_0h_A	ZH12_0h_B	ZH12_0h_C	ZH12_24h_A	ZH12_24h_B	ZH12_24h_C	ZH12_3h_A	ZH12_3h_B	ZH12_3h_C	ZH12_48h_A	ZH12_48h_B	ZH12_48h_C
Com_12_neg	L-(-)-Tyrosine	Amino Acid And Its Derivatives	74270	102300	85690	119200	92990	89160	121700	172700	149600	77340	181000	127800	419100	393400	325400	635200	416100	542300	493300	354500	316700	626500	455300	504600
Com_25_neg	D-2-Hydroxypentanedioic acid	Amino Acid And Its Derivatives	2174000	1301000	1322000	999800	898500	1416000	1075000	1048000	1120000	935700	723100	624300	1978000	1624000	1580000	978500	1314000	1214000	2064000	1447000	1758000	1273000	1384000	1208000
Com_42_neg	L-Saccharopine	Amino Acid And Its Derivatives	491400	533400	493900	607300	514400	380100	368100	291200	351800	605900	557200	678300	408900	227400	169700	591800	475600	336700	377400	403900	453100	486500	292200	400000
Com_64_neg	N-Acetylaspartate	Amino Acid And Its Derivatives	25740	26480	31490	27740	12990	13440	27240	11530	18830	8419	16020	7553	33610	33730	41640	34830	31940	37040	40430	24220	39180	38180	34410	28050
Com_65_neg	N,N-Dimethylglycine	Amino Acid And Its Derivatives	3151000	2846000	2309000	1505000	764900	965200	2283000	1137000	1097000	884500	762500	769500	3791000	3423000	3887000	4093000	3013000	3731000	4041000	3157000	4970000	3638000	2534000	3255000
Com_87_neg	D-Glutamic Acid	Amino Acid And Its Derivatives	178800	155900	137800	48660	31640	53320	159200	154000	125600	26930	47810	103700	218700	187900	165300	180500	171500	174800	187400	177100	193000	210400	181500	193400
Com_89_neg	N-Acetylthreonine	Amino Acid And Its Derivatives	172500	169000	131600	131600	167900	150800	81620	162600	129000	139300	137500	165200	206800	138700	147200	128600	175100	200000	180300	193800	184200	166800	152900	162200
Com_93_neg	5-oxoproline	Amino Acid And Its Derivatives	31580	15290	16490	18420	11409	11122	13663	12887	10814	12730	12450	7562	12010	36660	34660	29040	24400	31330	42790	29020	36270	36120	20130	23230
Com_107_neg	L-Homoserine	Amino Acid And Its Derivatives	15500	18600	7623	5255	823	7041	6954	14740	5638	3636	3957	2554	29260	24170	13670	35460	6998	36780	39760	20590	23920	22490	9206	16960
Com_110_neg	L-Homocitrulline	Amino Acid And Its Derivatives	6869	7319	12091	6051	7644	8304	9783	4405	10519	9901	9305	12815	5921	10860	7461	4361	7992	6060	12760	7116	6324	8106	8665	8375
Com_113_neg	L-(+)-Arginine	Amino Acid And Its Derivatives	138800000	133500000	106300000	117300000	62880000	87090000	96860000	41350000	57720000	81490000	48820000	64360000	50800000	53750000	68110000	69210000	27930000	36010000	39870000	24870000	51830000	78880000	47290000	63370000
Com_114_neg	N-Acetyl-L-glutamic acid	Amino Acid And Its Derivatives	69450	126500	158600	190200	171900	163300	159500	106700	191300	146200	214400	187700	157900	152300	155100	215700	84820	169700	170300	151000	147900	299700	182000	274600
Com_121_neg	3-(2-Naphthyl)-D-alanine	Amino Acid And Its Derivatives	6490	5526	7286	4089	5710	6471	6872	4829	7352	3072	4086	6700	8726	9115	8561	9752	9849	23780	11640	15160	14170	14660	4398	2409
Com_123_neg	Glutathione reduced form	Amino Acid And Its Derivatives	14460	18100	19300	12560	7036	12360	7155	21770	15610	20570	19960	24550	19580	13960	18210	12560	9094	28150	24520	17220	18770	28050	26460	18140
Com_166_neg	Creatine	Amino Acid And Its Derivatives	48520	34220	41450	55140	29150	48560	32240	48000	31380	23070	36570	38090	104900	68780	56480	50510	37450	64810	38110	63830	81640	80730	50590	106800
Com_173_neg	DL-homocysteine	Amino Acid And Its Derivatives	482800	252100	207400	114800	129900	62060	157900	118200	119500	135100	119300	113700	615100	305900	300500	166100	445400	382900	344300	559300	601900	209600	230900	326800
Com_178_neg	Allysine(6-Oxo DL-Norleucine)	Amino Acid And Its Derivatives	218100	454400	359600	258000	159100	175400	153800	450300	233500	136200	225400	230100	572100	619400	555700	444500	394600	500800	852900	639400	555200	407300	354200	572600
Com_183_pos	1-Methylhistidine	Amino Acid And Its Derivatives	386300	228900	184500	560900	321900	219500	355200	329500	250900	253900	470500	393500	529600	567000	493200	817500	577300	692300	557700	416900	819400	747500	1057000	480200
Com_190_pos	trans-3-Hydroxy-L-proline	Amino Acid And Its Derivatives	5730000	10650000	7330000	4463000	2940000	2707000	5520000	4039000	5028000	6709000	6957000	8412000	6980000	4333000	2855000	7467000	3747000	4461000	8736000	5334000	5611000	7834000	5934000	5882000
Com_206_pos	L-Leucine	Amino Acid And Its Derivatives	49710000	93360000	65200000	37750000	25050000	26080000	52070000	37540000	47420000	57680000	66040000	78950000	53110000	32380000	27360000	68010000	39140000	44630000	73240000	47050000	51270000	73690000	51570000	52700000
Com_208_pos	L-Isoleucine	Amino Acid And Its Derivatives	29270000	54850000	35690000	21760000	12790000	13590000	28960000	21880000	26060000	32870000	34380000	44190000	35160000	20530000	16860000	42670000	22860000	25860000	43610000	28540000	30150000	41760000	28360000	31150000
Com_216_pos	Phenylacetyl-L-Glutamine	Amino Acid And Its Derivatives	65960	66820	45300	101100	52340	68410	86330	73360	75770	70860	102000	88560	52850	49360	58320	77670	70010	70790	68160	41440	59450	116300	52880	67780
Com_220_pos	N6-Acetyl-L-Lysine	Amino Acid And Its Derivatives	3791000	4082000	2496000	2956000	3141000	3016000	2700000	1700000	1962000	2905000	2396000	3012000	2532000	2215000	1747000	1814000	1327000	1623000	1639000	2133000	2133000	1852000	1770000	2174000
Com_242_pos	1-Amino-1-cyclopentanecarboxylic acid	Amino Acid And Its Derivatives	224900	532900	529500	288100	240400	448300	246700	436100	341900	316500	235500	345100	253900	497200	360300	391100	277200	296300	555500	401000	256000	355200	232700	657200
Com_251_pos	Homoserine	Amino Acid And Its Derivatives	458800	641400	415200	459900	387600	491600	483100	335700	382700	487600	321700	535400	344500	335000	300000	375000	265000	310600	351800	359800	368400	292500	281200	446000
Com_252_pos	(-)-N-[3',4'-Dihydroxy-(E)-cinnamoyl]-L-glutamic acid	Amino Acid And Its Derivatives	381300	383900	323700	365900	388700	399900	363300	374800	375000	356800	376400	399700	405900	394000	506400	414100	481300	437900	515300	499700	428000	435500	435300	484300
Com_256_pos	Glu-Glu	Amino Acid And Its Derivatives	11770	19990	15330	40220	22480	42430	34750	33700	39080	43300	61430	45710	14030	13940	20410	30820	27700	18330	21090	14940	28630	76750	34000	46290
Com_262_pos	Histidine	Amino Acid And Its Derivatives	8613000	8250000	7680000	8861000	8953000	8338000	9768000	5956000	8818000	9963000	7345000	6690000	6971000	7485000	7025000	7809000	5004000	8430000	7286000	8280000	8322000	8420000	6991000	7456000
Com_263_pos	L-Homocarnosine	Amino Acid And Its Derivatives	4082000	1465000	1268000	2440000	2463000	2841000	3576000	2474000	1641000	3670000	2738000	2230000	2657000	1557000	1048000	4445000	4962000	3618000	1025000	1802000	2416000	5312000	2419000	989500
Com_264_pos	L-Homocystine	Amino Acid And Its Derivatives	2478000	2100000	3379000	2588000	3133000	2787000	1977000	4671000	4627000	3054000	2566000	3172000	3153000	5128000	1335000	2349000	1452000	2161000	4439000	2847000	2755000	2398000	3198000	3229000
Com_265_pos	Histamine	Amino Acid And Its Derivatives	649400	698700	613400	611500	587200	624500	737100	547200	622000	606300	535100	531600	564400	550000	454200	501700	291800	498000	524800	522700	582400	529300	412500	539900
Com_268_pos	Phosphocreatine	Amino Acid And Its Derivatives	838600	1026000	740700	960900	890200	642500	1193000	801900	659500	835500	816700	988700	926300	897300	908300	1047000	902200	993900	942500	1175000	1173000	865600	922600	1067000
Com_272_pos	S-(5-Adenosy)-L-Homocysteine	Amino Acid And Its Derivatives	10500	7656	14320	7460	13220	10060	4661	30390	22320	13500	22330	10630	6553	12580	4305	17280	3113	18490	23540	13440	10750	24410	17400	22240
Com_274_pos	Nα-Acetyl-L-Arginine	Amino Acid And Its Derivatives	373800	332700	316400	670200	521400	649600	456500	563400	628900	805000	915100	782200	342000	393600	543500	658700	485500	557700	354400	358300	680800	725200	615900	712300
Com_277_pos	3-Hydroxy-3-Methylpentane-1,5-Dioic Acid	Amino Acid And Its Derivatives	47290	70710	25490	94510	82640	59950	80890	96830	89020	90160	110600	139200	75040	73210	83700	154800	72130	120500	61550	81900	91120	128400	111700	82170
Com_278_pos	3-Chloro-L-Tyrosine	Amino Acid And Its Derivatives	18910	7664	19890	16220	9673	14260	40550	22900	33040	36570	25380	39470	71130	91820	130100	84160	64690	140000	227300	41380	69330	118300	79740	153100
Com_293_pos	Delta-Gluconolactone	Amino Acid And Its Derivatives	53580	55940	146900	584200	116800	129500	117100	250500	53270	53070	65880	58310	141500	117000	139100	59570	41370	69910	50820	115800	113100	59600	63520	30190
Com_301_pos	γ-Glu-Leu	Amino Acid And Its Derivatives	22250	47680	31510	22010	13810	25490	18100	2833	8383	20820	8715	22720	23240	12190	5196	22990	5878	10410	18130	14810	14600	21430	11520	11130
Com_304_pos	L-Ornithine	Amino Acid And Its Derivatives	22180000	26580000	23040000	17010000	13850000	19450000	18730000	16300000	17540000	18350000	10860000	15590000	13580000	16210000	15170000	11810000	7522000	9364000	14780000	13920000	14550000	10560000	8722000	16690000
Com_333_pos	Glutathione Oxidized	Amino Acid And Its Derivatives	333900	378700	297800	248000	117600	55940	70470	177100	83550	116100	81710	199100	368600	388000	360800	145300	106300	304400	871100	443300	648200	90220	189800	336200
Com_350_pos	L-Methionine sulfone	Amino Acid And Its Derivatives	132700	114200	112100	164400	180600	137700	139300	126500	146300	159400	191600	179400	208000	220100	227900	238900	211100	237300	214000	159000	184900	194800	232000	210000
Com_351_pos	S-Methyl-L-cysteine	Amino Acid And Its Derivatives	773900	671600	865300	904700	1010000	917000	725300	1130000	1010000	797800	903600	1034000	924900	1388000	465700	787700	547300	699500	1139000	703800	828300	772600	884500	819900
Com_360_pos	H-Homoarg-Oh	Amino Acid And Its Derivatives	358800	367900	233800	437000	119900	215000	470300	83260	163600	426000	328400	478400	123700	173400	255500	590700	98690	348500	108400	83450	290200	712700	172500	202700
Com_367_pos	L-Glutamic Acid	Amino Acid And Its Derivatives	103100000	95950000	79580000	89120000	66090000	78070000	81510000	58840000	60430000	83000000	75230000	86870000	73500000	61180000	76370000	69910000	64200000	64130000	60720000	56050000	85290000	65770000	60960000	62020000
Com_371_pos	L-Cystine	Amino Acid And Its Derivatives	952700	697200	512400	1237000	1162000	1043000	895300	817700	640200	875800	1066000	1128000	1058000	856500	963400	1696000	1271000	1420000	798400	875400	1343000	1582000	1084000	1185000
Com_372_pos	D-Methionine	Amino Acid And Its Derivatives	1286000	1496000	404800	1621000	551100	695300	1406000	787700	954100	1956000	1145000	2327000	1097000	932100	790400	2037000	727400	1493000	1517000	410300	1338000	2207000	1291000	1444000
Com_373_pos	D-Norvaline	Amino Acid And Its Derivatives	36360000	59900000	45530000	20480000	9828000	13540000	21740000	16040000	19780000	34080000	20910000	30420000	21270000	15770000	9741000	16820000	10500000	11640000	33210000	19730000	18720000	18360000	16920000	19520000
Com_377_pos	DL-threo-beta-Methylaspartic acid	Amino Acid And Its Derivatives	229300	267100	204700	178700	94140	131500	137900	234200	171200	139400	164400	189900	238700	285600	210700	189200	191100	164000	298400	249600	191900	160800	169800	242000
Com_382_pos	Xanthurenic acid O-hexoside	Amino Acid And Its Derivatives	34550	28990	12480	54580	45640	30180	42750	30320	35920	28110	82740	61710	56070	52870	55950	78700	75140	57480	19890	34100	54530	80490	43380	48800
Com_388_pos	N-Phenylacetylglycine	Amino Acid And Its Derivatives	3284	3018	3345	3180	4247	3446	3751	1987	3213	2696	7014	4021	3175	5012	4651	3235	3570	4260	4907	4490	3061	3902	4847	2864
Com_399_pos	2-Phenylglycine	Amino Acid And Its Derivatives	631400	802200	1045000	625400	781600	608900	519400	1934000	780200	400800	1124000	1071000	773200	499500	724600	498300	347400	973200	1056000	1429000	794700	855300	770300	1389000
Com_419_pos	Phe-Phe	Amino Acid And Its Derivatives	9162	8966	9349	9654	11530	6340	5418	12430	7170	6383	11000	5927	18380	10160	6818	8527	12400	18330	9876	10290	14680	13450	22740	21880
Com_420_pos	L-Serine	Amino Acid And Its Derivatives	1702000	2945000	2115000	1709000	1309000	1929000	1655000	1944000	1369000	1827000	1861000	2444000	1967000	2333000	1709000	4153000	2204000	1976000	1883000	1608000	1401000	2812000	1429000	2781000
Com_421_pos	L-Theanine	Amino Acid And Its Derivatives	34880000	38180000	30790000	36750000	25100000	30470000	30760000	12400000	19360000	26600000	16040000	19170000	10120000	13170000	16360000	15920000	6999000	8983000	8735000	5475000	11500000	19850000	9582000	14640000
Com_422_pos	L-Tryptophan	Amino Acid And Its Derivatives	36740000	37530000	24410000	43510000	12220000	23960000	37030000	9341000	17090000	42960000	30100000	51950000	11390000	17920000	26520000	60600000	9874000	31180000	11110000	7593000	29840000	70970000	20130000	19480000
Com_423_pos	L-Phenylalanine	Amino Acid And Its Derivatives	118100000	142900000	118300000	89590000	59510000	60070000	94540000	68960000	79410000	119500000	124500000	122100000	89030000	80590000	50860000	126300000	71040000	109700000	122800000	57820000	73820000	160900000	107500000	118100000
Com_424_pos	L-Pipecolic Acid	Amino Acid And Its Derivatives	6863000	16960000	17770000	8408000	7375000	12410000	7637000	16740000	9869000	9689000	8264000	9719000	8639000	15890000	10830000	10910000	9391000	7957000	17500000	12440000	8262000	9423000	8088000	20530000
Com_427_pos	L-Tyrosine	Amino Acid And Its Derivatives	2164000	2257000	1667000	3666000	3565000	2844000	2863000	4214000	4722000	3804000	6846000	5422000	5764000	5324000	4442000	7984000	6053000	7416000	7372000	5163000	5551000	8021000	7356000	7609000
Com_435_pos	N-Acetyltryptamine	Amino Acid And Its Derivatives	284500	278400	149900	150900	161400	170000	243200	202600	233900	223900	106900	223900	83180	205100	103800	142700	50370	159200	78820	99620	166600	129200	79700	127500
Com_436_pos	N-Acetylputrescine	Amino Acid And Its Derivatives	281100	280600	274800	314800	223000	225800	200200	223500	243600	186400	106300	210600	122800	170800	172400	85350	253000	87460	98890	51780	110500	134400	68290	186400
Com_437_pos	N-Acetylneuraminic Acid	Amino Acid And Its Derivatives	225600	241400	216700	228100	223400	213700	226400	226700	221400	222900	231000	246500	268700	233600	312700	260300	287100	240000	308000	303600	303000	250400	272100	260700
Com_438_pos	N-Acetyl-L-Tyrosine	Amino Acid And Its Derivatives	57390	56710	49680	137600	92830	82930	96940	84390	84790	123400	195300	213300	113800	88290	112400	197300	147000	193500	104300	90550	131600	193700	200400	204900
Com_453_pos	Phe-Pro	Amino Acid And Its Derivatives	22060	24270	26660	19800	28650	25730	35710	44000	39290	32100	45240	46890	31100	25690	19980	29480	16390	46400	37390	42160	35020	54750	23760	39800
Com_454_pos	D-beta-Homophenylalanine	Amino Acid And Its Derivatives	35560	30290	12860	96480	58530	24550	18490	43210	46880	44550	89510	44860	54750	33760	61890	106900	57150	62320	45260	59500	70140	87090	39900	53770
Com_459_pos	D-(+)-Octopine	Amino Acid And Its Derivatives	51050	50190	23950	34230	36020	34110	36050	23420	26400	39790	27880	36490	36340	39420	42060	31590	25060	20490	31150	24650	35740	28740	28840	19380
Com_476_pos	Glutathione Reducedform	Amino Acid And Its Derivatives	36750	29900	51830	36570	27410	19580	18410	20760	27260	22580	16360	26120	30710	43370	49730	36440	22120	36700	73990	28540	65770	22650	38070	58510
Com_487_pos	L-Asparagine	Amino Acid And Its Derivatives	256900000	279600000	252700000	206500000	181500000	224500000	215000000	199500000	213600000	222300000	151300000	203900000	177400000	212200000	191400000	156400000	93310000	133700000	191500000	175400000	177600000	147900000	128800000	205200000
Com_488_pos	L-Alanine	Amino Acid And Its Derivatives	1117000	2247000	1579000	3649000	2403000	2774000	1557000	3591000	2320000	3883000	2992000	3841000	1210000	1403000	716000	2551000	1825000	2221000	2608000	2428000	1835000	2833000	2832000	3209000
Com_492_pos	L-Aspartic Acid	Amino Acid And Its Derivatives	378100	447400	276900	638800	512700	343900	457800	135000	261800	408600	338500	264600	81460	92210	72400	76000	61860	92810	103200	67000	138300	96500	99510	102300
Com_493_pos	L-Citrulline	Amino Acid And Its Derivatives	3490000	3790000	3128000	3452000	2607000	2948000	3010000	1329000	1864000	2600000	1650000	2015000	1024000	1122000	1521000	1545000	687000	872300	1115000	754300	1393000	2945000	1096000	1962000
Com_495_pos	D-Pyrrolidine-2-Carboxylic Acid	Amino Acid And Its Derivatives	58210000	137000000	247400000	51870000	72360000	56600000	50170000	231300000	71210000	64380000	71460000	54310000	31630000	139500000	32040000	37360000	27680000	32310000	119100000	88800000	32820000	50030000	27260000	81410000
Com_497_pos	D-(-)-Glutamine	Amino Acid And Its Derivatives	26370000	31320000	27980000	32800000	20290000	27330000	31600000	29680000	30910000	41410000	33650000	34130000	20780000	25620000	21040000	38170000	19150000	25850000	28400000	24440000	30950000	54990000	37320000	40670000
Com_502_pos	Cys-Gly	Amino Acid And Its Derivatives	30040	20980	17140	18370	26810	18940	30640	21770	17050	29330	10830	22340	19200	23360	18140	10270	17940	19790	17360	16710	15720	14000	11970	15980
Com_513_pos	N8-Acetylspermidine	Amino Acid And Its Derivatives	58200	65490	65290	28950	32440	37160	43780	88190	41930	57450	67630	81810	61840	31570	31370	79150	85380	53330	65170	59620	15700	123000	32530	81150
Com_514_pos	N-Acetyl-D-tryptophan	Amino Acid And Its Derivatives	60170	29120	24650	71690	47710	57500	69600	44820	55720	70190	53420	39890	25080	20550	30206	47380	11540	14020	13940	12420	49250	49259	16450	34970
Com_515_pos	N-Acetyl-Dl-glutamic acid	Amino Acid And Its Derivatives	150000	179300	125900	268500	274100	259100	234100	164800	139300	236000	190600	262300	166500	174200	216100	286200	233600	279800	67500	158400	213100	239900	131900	200700
Com_516_pos	N-Acetyl-L-Histidine	Amino Acid And Its Derivatives	4040000	2438000	2178000	5633000	4895000	4328000	5612000	2716000	3809000	6296000	4848000	3553000	2500000	2610000	3119000	3972000	2819000	4564000	2160000	2882000	3577000	4155000	3300000	2819000
Com_517_pos	N-Acetyl-L-leucine	Amino Acid And Its Derivatives	19050	18380	5216	19709	14150	19396	19773	15880	19700	37880	27430	35270	20940	13269	8128	28260	6101	20042	8112	8651	20950	18080	12300	27550
Com_526_pos	6-Aminohexanoic acid	Amino Acid And Its Derivatives	92090	159200	117400	35640	43940	34550	72400	54230	51340	95920	88640	127000	104600	60350	49230	109900	40700	62510	106000	68180	65480	111200	75190	85560
Com_542_pos	L-Valine	Amino Acid And Its Derivatives	1721000	3046000	2030000	908000	547100	603200	925800	703400	865000	1544000	1019000	1448000	1079000	779400	504200	731300	580500	618100	1818000	949600	901700	858000	874000	999000
Com_546_pos	Val-Ser	Amino Acid And Its Derivatives	156000	133000	84810	155900	159200	129500	102500	149000	136400	76600	158900	126500	128400	140600	115500	177700	191900	142300	116800	105600	146400	158100	134700	169000
Com_557_pos	Lysine butyrate	Amino Acid And Its Derivatives	2625	2416	3316	3048	1545	1953	3574	2662	5243	7761	4218	3871	2721	3470	2366	2247	2102	3711	2954	2690	5192	4656	3242	3066
Com_560_pos	N-Glycyl-L-Leucine	Amino Acid And Its Derivatives	55160	61370	72140	53370	44270	52600	53760	110700	79580	46500	69010	64890	51320	79640	55920	46750	45980	40380	68730	76750	76010	72480	53520	46840
Com_567_pos	Ng,Ng-Dimethylarginine	Amino Acid And Its Derivatives	281200	303700	221700	358400	317100	321800	325300	178500	233900	288800	258000	291600	216800	244100	232600	351700	200700	285100	190600	190400	294400	391400	188400	326400
Com_568_pos	N-Hydroxy-L-tryptophan	Amino Acid And Its Derivatives	1934000	1431000	966400	2711000	1516000	1196000	1223000	953200	991200	1621000	1530000	1787000	542500	788500	800200	861200	592300	750000	713400	502500	1049000	1956000	631400	704300
Com_205_pos	COLUMBIANETIN ACETATE	Phenylpropanoids	12900	4483	6860	3924	4539	4277	12840	4773	6396	5164	5168	3162	5070	14270	5786	2134	5015	3068	5375	5646	2394	10030	8471	2129
Com_224_pos	6-Methyl Coumarin	Phenylpropanoids	16090	12170	19700	7741	39110	16068	14456	15670	11990	8482	12600	18390	4790	9640	8300	7001	8725	16082	11530	7429	17780	7199	7096	5093
Com_331_pos	P-Coumaraldehyde	Phenylpropanoids	4708	12820	6640	14669	10210	26240	9673	15580	12981	12320	5640	11440	30380	9690	8281	33460	27230	7709	7305	11996	14780	6371	13632	24690
Com_401_pos	3,4-Dihydro Coumarin	Phenylpropanoids	129500	198800	70713	34340	109600	94140	54320	31900	157300	52820	71950	21370	68260	135000	113700	101600	63330	29100	34060	46480	50970	71530	37520	117300
Com_455_pos	Nodakenin	Phenylpropanoids	14360	7899	6611	15200	10890	10480	4598	7038	6950	7910	6462	4661	15600	17990	5976	4445	14940	17750	3433	8222	9721	12000	11130	5970
Com_470_pos	Fraxetin	Phenylpropanoids	4738	4307	3312	5761	23200	4916	9936	2232	5516	2065	7645	2571	7529	3047	3916	4528	1905	4811	6722	2844	6920	5629	2729	1740
Com_550_pos	Scopoletin (7-Hydroxy-5-Methoxycoumarin)	Phenylpropanoids	6463	8739	6333	8130	19440	15273	31850	12430	15720	19160	6213	18580	27410	18012	6647	25960	18950	25430	12740	11111	24770	156300	33170	14810
Com_155_neg	trans-P-Coumaric acid	Phenylpropanoids and polyketides	87550	97750	99050	54320	26030	26600	51300	85600	40590	45980	35260	35890	254100	265800	80260	138500	60160	171100	349000	144500	277300	152900	157500	93710
Com_186_pos	Angelicin	Phenylpropanoids and polyketides	11150	9412	10080	9457	4632	7870	12290	10910	4499	9554	3831	4127	14810	8448	4384	7527	3436	6114	10710	2508	14500	6907	5904	14140
Com_259_pos	Cinnamal	Phenylpropanoids and polyketides	13550	9025	7834	8757	11400	20420	5287	5706	7211	12120	8253	14440	9672	14810	12250	23340	18300	10630	7124	4703	11800	5527	3856	8629
Com_387_pos	Psoralen	Phenylpropanoids and polyketides	7715	3097	11590	14180	8529	5631	2106	5199	5184	2971	5432	34160	3932	8986	4802	4693	4179	8995	4645	2700	6225	4597	22330	33350
Com_175_neg	Sulfosalicylic acid	Benzene and substituted derivatives	27410	32550	18210	20640	32251	32500	22210	47270	23400	31607	32881	37381	77220	95360	57120	74510	84080	109600	145900	90390	130700	78810	75030	76090
Com_267_pos	Hordenine	Benzene and substituted derivatives	11110000	17220000	13000000	6083000	6088000	3485000	3893000	6434000	8544000	14470000	10960000	15410000	4382000	6215000	4363000	13400000	5847000	4723000	12640000	4340000	8386000	21450000	12420000	11100000
Com_276_pos	Dihydrocapsaicin	Benzene and substituted derivatives	13260	7703	6027	15620	5763	7454	9961	5656	6571	10540	3323	8529	8279	6218	6327	4922	3012	6905	3950	5873	7909	3663	6248	7210
Com_346_pos	Sibutramine	Benzene and substituted derivatives	871400	887600	887500	930900	941800	918700	819700	896700	890400	920900	997200	942100	758500	698900	920200	1030000	1053000	1001000	1035000	895500	915300	1096000	1010000	982700
Com_353_pos	Sildenafil	Benzene and substituted derivatives	20960	16860	18830	12600	42410	22660	37520	13130	18030	11280	21980	22710	14480	15110	12820	12750	20240	42730	16780	17970	15580	15520	10170	15940
Com_361_pos	Tyramine	Benzene and substituted derivatives	9227	5218	10380	7764	5604	9099	4844	7423	7675	2293	10710	14710	8593	4664	5534	7690	5489	5909	4582	6429	4099	9203	16920	17380
Com_394_pos	3,4-Dihydroxybenzaldehyde	Benzene and substituted derivatives	100216	204100	499800	50080	48290	99050	66340	152100	59020	39890	64015	71250	88681	123700	84480	50886	112800	55182	78580	58390	98830	70530	158500	30340
Com_45_neg	Benzoic acid	Benzoic Acid And Its Derivatives	102600	106100	127200	133100	152400	103900	172900	114600	107300	100000	129900	92190	138900	217200	145400	112400	124900	124800	200100	120200	212800	153100	206400	94410
Com_46_neg	Benzoylformic Acid	Benzoic Acid And Its Derivatives	7412	7888	12739	10141	8513	7265	6500	7576	10534	10237	10000	14967	7301	13710	7296	12260	10720	12650	6710	11350	14800	12880	18450	11410
Com_414_pos	(3,4-Dimethoxyphenyl) Acetic Acid	Benzoic Acid And Its Derivatives	3868	3297	2029	3094	3287	2067	1672	3404	2368	2254	2623	2790	2503	6495	3881	1745	2344	5834	3336	2212	3263	2859	3271	3292
Com_200_pos	p-Anisaldehyde	Pyridine And Its Derivatives	78610	73970	42540	82380	68630	111200	64340	77000	69230	52200	91690	115200	37380	19620	43550	50350	32110	44690	40980	12490	30340	46590	27830	35400
Com_225_pos	6-Hydroxynicotinic Acid	Pyridine And Its Derivatives	60080	64460	59340	48740	61360	66880	37700	24860	53640	51520	62200	64510	66110	89640	52440	118300	74670	72860	37570	47460	78150	98770	60170	51260
Com_400_pos	2-Picolinic Acid	Pyridine And Its Derivatives	1170000	1094000	1144000	2047000	2510000	2110000	2025000	1874000	1815000	2299000	2983000	2535000	1358000	1437000	1746000	2516000	2165000	2405000	1844000	1685000	1892000	2617000	2023000	1960000
Com_450_pos	4-Pyridoxic Acid	Pyridine And Its Derivatives	22510	17870	53470	61460	48940	47320	37650	23750	30180	42300	33230	25840	27890	52860	61220	48920	39010	41680	40080	52040	58160	34750	22750	30150
Com_3_neg	1,5-Anhydro-D-glucitol	Alcohols and polyols	42060	50110	42970	53350	36580	29010	40120	32720	50110	34600	44250	52040	96750	75050	84040	73410	88010	119900	82590	87160	101700	73910	92140	73300
Com_365_pos	Choline	Cholines	2298000	2558000	2135000	2554000	2216000	2263000	1924000	2351000	2288000	2244000	2516000	2367000	2792000	2393000	2466000	2691000	2363000	2067000	2498000	2573000	2821000	2440000	2465000	2446000
Com_194_pos	N', N''-Dicaffeoylspermidine	Polyamine	26330	17762	19660	29090	28270	28160	19750	21040	22920	22150	25420	18500	25530	15350	34490	35910	22150	30590	24090	21850	27990	24920	22600	5847
Com_229_pos	Phenethylamine	Polyamine	27900	32570	31550	35330	24560	25490	31410	39250	43110	41450	55240	54410	15340	16580	17300	49820	29460	31260	18390	7093	10870	62390	30930	24880
Com_246_pos	Spermidine	Polyamine	6498000	4073000	4038000	9138000	7891000	8901000	6505000	10780000	8275000	7740000	13110000	9323000	3034000	1698000	1466000	6446000	3886000	2784000	1992000	838100	1762000	10090000	2620000	4198000
Com_254_pos	Spermine	Polyamine	82790	77290	73340	188900	117700	165600	120300	91990	101700	83030	107300	82760	86120	76070	80640	124900	72690	67490	115500	66490	119200	129900	59150	82180
Com_313_pos	Diethanolamine	Polyamine	99260	208000	105000	64060	62420	116700	147900	106100	114200	82520	88570	154800	141300	130200	76490	345300	171000	140100	117100	143700	54560	156500	56270	174500
Com_316_pos	N- Feruloylcadaverine	Polyamine	12620	21240	14410	12230	9354	7547	5675	17630	12080	6844	9435	9319	26530	35220	4582	10487	3311	10868	15610	9123	10970	7735	6745	6420
Com_391_pos	N-p-Cinnamoylputrescine	Polyamine	7694	12100	8577	6315	10490	6329	6109	3912	5777	3912	7794	4071	5543	5117	4692	9185	5556	6374	4929	5457	6198	10580	10600	7109
Com_392_pos	N-p-Cinnamoylagmatine	Polyamine	177900	229300	179800	538300	302800	377900	329800	346600	274100	431200	421800	429400	49680	28220	190400	652300	523300	255300	9507	27410	6850	475100	371400	254100
Com_404_pos	N', N''-Caffeoyl, feruloylputrescine	Polyamine	5571	5478	4148	4673	7048	4523	7204	6825	8492	6941	6721	5472	8499	13640	8701	4527	10930	3891	9434	3054	3451	6518	4710	7696
Com_480_pos	N', N'', N'''-Di-p-hydroxybenxoyl, feruloylagmatine	Polyamine	95760	47390	68930	89440	76000	98850	112000	106400	60540	64370	63380	76350	110200	117900	106900	114800	118200	107200	69940	108000	88960	65390	114600	61440
Com_481_pos	N', N'', N'''-Di-p-coumaroyl, p-hydroxybenxoylagmatine	Polyamine	10020	9487	9959	20550	9747	15010	9333	21120	10150	19110	8412	12840	8676	8224	7798	15020	13670	14000	18870	7238	8076	11740	14830	18810
Com_482_pos	N', N'',N'''-Triferuloylagmatine	Polyamine	19170	20760	13210	16130	15050	21090	11410	15440	11740	16370	17060	22880	14840	12610	19470	13710	16590	11090	11720	16460	13160	12530	12180	17860
Com_147_neg	4-Hydroxy-3-methoxycinnamic acid	Polyphenol	86250	85840	81080	88840	124500	68113	116700	78930	75210	63330	86600	99960	87244	88614	70039	102400	80990	154000	115737	80774	107971	90888	87415	105838
Com_204_pos	Coniferyl aldehyde	Polyphenol	22810	21280	18820	12920	5316	5526	5473	14290	11130	10270	12230	7923	26940	23250	5603	16090	3970	10740	24930	10830	3305	8838	11600	6796
Com_284_pos	Nicotinic acid-hexoside	Polyphenol	76550	81710	77070	50730	120300	94180	85040	32770	73660	81380	137200	111900	33170	50470	17540	55090	36120	59750	57723	40220	38020	119100	55470	49590
Com_181_pos	L-Epicatechin	Catechin derivatives	14930	8921	7885	18980	9669	7070	5591	5730	3449	4906	6804	2727	6733	9075	8192	12660	10670	6811	10270	11190	13430	3556	7157	10220
Com_189_pos	Agmatine Sulfate	Phenolamine	24783	26217	21231	15480	11730	53660	21810	22091	21515	21330	8993	26200	26290	46110	8971	26720	25819	26032	34220	17210	15020	44329	23542	20148
Com_195_pos	N', N''-DiFeruloylspermidine	Phenolamine	671500	640200	288000	652400	612700	623800	547400	572200	623900	377200	643000	721800	332700	425400	359200	394600	413400	461600	332100	367000	384400	532400	487000	527500
Com_196_pos	N', N''-DiFeruloylagamtine-N-arabinoside	Phenolamine	322500	343300	283500	335300	351900	264100	331700	285500	280100	341000	409800	364300	298000	356100	321400	296300	330200	265400	265500	236500	313300	349500	313700	269400
Com_253_pos	Spermidine derivative	Phenolamine	24040	21760	21110	26740	23940	23360	25470	23330	22200	24700	23220	28070	24870	22770	37040	35790	33670	36160	34970	33850	33780	34220	32180	32110
Com_389_pos	N-p-Coumaroylspermidine	Phenolamine	5801	3556	4278	5991	8068	5944	12690	8222	4474	10240	2782	2250	1689	2561	4389	1956	6218	6845	3489	11980	11270	12692	5927	6830
Com_390_pos	N-p-Coumaroylagmatine	Phenolamine	377300	476800	400900	633900	428800	369500	370000	426300	359000	593700	395900	560800	342200	282800	455500	565600	537500	533100	237700	347900	122500	423800	595400	639000
Com_393_pos	N-Sinapoylagmatine	Phenolamine	4182	8754	6330	7095	3635	5150	5772	4760	3733	7135	4673	6137	9200	8841	11190	4609	9891	7789	12690	10780	7060	4318	5311	6019
Com_448_pos	N', N''-DiSinapoylspermidine	Phenolamine	12500	15020	13070	22930	21850	18680	18450	17900	18840	15810	21880	24220	7361	7627	13450	20490	18350	28720	14180	4752	12090	19750	12850	12990
Com_478_pos	N', N'', N'''-DiFeruloyl,Sinapoylspermidine	Phenolamine	22330	25410	20760	21270	21570	23900	23410	21440	21670	20210	22020	22550	11450	14320	16210	17190	18740	21070	20860	21670	22620	16240	18830	26510
Com_562_pos	N-Feruloylputrescine	Phenolamine	8219	13070	12410	13500	11550	26320	27570	7054	9618	15650	15280	36310	23860	33440	81560	91190	949500	95560	16880	63850	29080	56950	57000	91980
Com_565_pos	N-Feruloylspermidine derivative	Phenolamine	2762	4281	3005	1899	3886	1370	1954	2104	1312	1645	2383	2178	2353	1052	2567	2256	1726	2990	3446	2471	3199	1101	2500	2148
Com_137_neg	8-Gingerol 1	Phenols	11970	8648	5389	11640	10210	9451	13120	13070	13100	19200	24850	16220	7687	16650	9579	25440	14560	15810	13050	13450	16690	30410	26160	15040
Com_149_neg	Coniferin	Phenols	1060000	1522000	1245000	87720000	27090000	58340000	18240000	16260000	19490000	106800000	78080000	87440000	654200	839300	3533000	77290000	28210000	37390000	17480000	18180000	18960000	108800000	75580000	85260000
Com_325_pos	Acetaminophen	Phenols	502500	756500	928000	585900	723700	482200	243500	1666000	926700	376000	1010000	651500	533600	343900	712500	396300	361600	981700	1208000	961500	1033000	798900	721800	975700
Com_402_pos	Maackiain	Phenols	34710	19560	10360	52620	20500	35510	70540	47560	57810	26160	40060	27360	25400	17840	52450	52990	64170	64280	33910	18200	36150	58240	9219	38110
Com_471_pos	Synephrine	Phenols	12900	20080	8899	7538	16520	9543	13150	4573	8073	11200	15320	15400	10840	15030	19640	17760	13170	12510	13120	9061	5768	18340	12300	16040
Com_518_pos	6-Gingerol	Phenols	64900	97370	82670	89280	135200	130400	134500	135000	106500	75100	82610	184800	79130	63640	148200	39140	72610	74380	73280	107800	73440	114700	33090	67050
Com_230_pos	Protocatechuic Acid	Phenols And Its Derivatives	1718000	682400	503700	1093000	1433000	1519000	851500	1346000	1316000	1855000	1599000	1378000	993100	588900	589500	1833000	1742000	1256000	646500	827300	1246000	2301000	1116000	656000
Com_484_pos	Myoinositol	Phenols And Its Derivatives	31963	14920	16030	63810	46750	15400	37780	19920	10920	47120	46310	42850	71060	34870	16850	39730	52810	15710	55110	30611	24390	23270	43360	35070
Com_539_pos	LysoPC 20:2 (2n isomer)	Glycerophospholipids	1343	4606	2327	1144	2653	1094	1600	2429	2472	3532	6024	779	3753	2937	794	3752	1611	2526	1607	1869	1759	1195	3539	5573
Com_31_neg	Uridine 5'-monophosphate	Nucleotide and its derivates	30390	26720	32650	18900	56920	24850	16720	92590	19950	34940	95230	63060	27430	21190	89730	88270	24070	78920	39910	25100	14520	99340	64160	82650
Com_49_neg	Uridine 5'-diphospho-D-glucose	Nucleotide and its derivates	76530	126400	128800	57900	468500	37650	102200	288200	170200	35010	146900	270000	644200	212600	491400	113800	104600	388800	802000	494500	763300	168700	190300	137200
Com_61_neg	Xanthosine	Nucleotide And Its Derivates	91120	64780	47210	57430	23890	37340	54220	47300	43780	47850	23130	39070	43150	56580	45040	45450	41400	35740	41850	42140	46660	59430	40120	45660
Com_82_neg	Cyclic AMP	Nucleotide and its derivates	39620	33970	49330	17570	10070	17400	13420	39190	22760	25010	34060	26060	90420	78800	13530	9468	3800	4582	36880	15230	5982	30180	22080	8811
Com_85_neg	Deoxyguanosine diphosphate (dGDP)	Nucleotide And Its Derivates	24630	40170	63520	28630	25080	16380	8946	25450	16720	12480	7348	6946	35600	45030	39140	16460	21090	47390	76330	102200	79160	13610	49410	66510
Com_86_neg	deoxyguanosine 5'-monophosphate (dGMP)	Nucleotide And Its Derivates	17020	13990	17740	30350	46680	29920	20120	68320	33430	47270	151000	61950	14220	8645	45870	129400	170800	64770	27200	16290	7512	238900	134600	81050
Com_90_neg	5-Hydroxymethyluracil	Nucleotide And Its Derivates	6077	8301	26840	15400	10380	11870	23210	10850	10010	21180	13510	24380	16450	18930	37320	22700	18400	24700	19310	11000	22140	10270	22000	17360
Com_109_neg	AMP	Nucleotide And Its Derivates	33670	21600	41280	71430	113500	58020	37150	176200	62760	89770	267200	129900	20900	22800	102000	243900	407800	142900	55170	41810	22450	406800	318900	162200
Com_130_neg	dGDP	Nucleotide And Its Derivates	26600	30780	36410	22220	11470	8530	14970	16410	12240	18060	14700	26440	35750	36730	26030	20930	5936	15460	68170	62700	85820	12950	28570	58570
Com_131_neg	Uridine 5’-Diphosphate	Nucleotide And Its Derivates	26080	11660	43240	4137	3769	5336	20190	24770	7310	12170	15310	7393	26730	29050	37130	27860	7737	20480	12480	29890	40080	10130	4003	18590
Com_141_neg	β-Pseudouridine	Nucleotide and its derivates	1378000	1762000	1253000	834400	529500	881300	1177000	600900	583000	553100	468000	714200	881100	792400	1159000	1271000	818000	1760000	1288000	1206000	1333000	1351000	936000	1363000
Com_157_neg	Cytidine 5'-monophosphate (Cytidylic acid)	Nucleotide and its derivates	16300	14360	5231	21580	19820	13950	11490	23870	8578	14960	22860	28900	19140	18850	20640	20900	19620	21370	28160	10800	20770	27710	28940	34780
Com_168_neg	Guanosine 5'-monophosphate	Nucleotide And Its Derivates	12487	6463	3854	6635	13800	6948	7453	18050	4810	13050	19280	13470	1598	4300	14490	19252	15350	21150	7396	8485	16661	31650	53170	41800
Com_182_pos	1-Methyladenosine	Nucleotide And Its Derivates	348800	657500	484600	518300	450600	707400	456800	530000	467400	509300	525200	918300	161200	253300	414400	515700	388800	484100	324700	263600	437800	660900	341600	500300
Com_185_pos	2,6-Dihydroxypurine	Nucleotide And Its Derivates	656800	667300	422800	652000	553200	691000	587400	430100	417700	711700	497300	639300	279200	505500	450800	492800	357700	464500	364800	368700	715600	549000	335000	505000
Com_187_pos	Allopurinol	Nucleotide And Its Derivates	110700	107400	138300	156300	121900	213600	144400	193500	210500	189800	167900	200700	173100	317300	77110	120900	122100	119300	274700	117800	115600	152500	132200	136700
Com_213_pos	Deoxyguanosine	Nucleotide And Its Derivates	85420	82120	64780	61070	72900	54930	53760	42260	69620	52880	30360	44070	68000	109300	70700	82680	55150	60100	111100	61340	78580	76670	91990	70810
Com_226_pos	8-Hydroxyguanosine	Nucleotide And Its Derivates	87570	76050	84390	74540	76630	74460	92470	81160	93960	94210	59640	60600	68070	69930	114400	78010	65310	86550	103400	107200	94650	75190	57960	82040
Com_227_pos	8-Hydroxy-2-Deoxyguanosine	Nucleotide And Its Derivates	18840	17950	15930	18510	20150	20440	16690	24300	19700	19040	21200	21160	15050	17840	44190	39580	39640	41850	52280	42200	35860	33990	35960	35880
Com_233_pos	Β-Nicotinamide Mononucleotide	Nucleotide And Its Derivates	347800	297200	320700	562600	238600	302300	308200	343500	395400	387900	262600	375500	224000	311300	101800	190500	114700	136800	168000	102700	86940	339300	184100	146300
Com_237_pos	1-Methyladenine	Nucleotide And Its Derivates	672100	636400	517700	789900	756400	622300	700400	585600	513800	684700	703500	803800	600300	649600	684500	746200	720400	739200	486400	589300	705900	813500	695200	641000
Com_245_pos	Hypoxanthine	Nucleotide And Its Derivates	164300	88930	132100	170700	161100	198200	148200	183400	164200	177500	149100	137500	167400	186900	223300	186800	173200	164900	177300	206000	166100	136700	221500	199800
Com_292_pos	N6,N6-dimethyladenine	Nucleotide and its derivates	60770	94330	97090	208100	293400	71780	68330	125000	136960	331800	106500	162500	94900	196800	221700	188700	183700	84530	177400	70960	98140	130200	107900	126300
Com_311_pos	Guanosine	Nucleotide and its derivates	157000	200200	270200	124400	152300	175500	66440	394600	234900	98440	230200	200000	114300	107700	163000	104900	94180	227400	390900	281100	279400	163400	212900	286500
Com_320_pos	5'-Deoxy-5'-(Methylthio)Adenosine	Nucleotide And Its Derivates	1515000	1483000	1390000	1264000	1830000	1429000	1256000	2077000	1494000	1827000	1936000	2461000	1537000	1669000	1540000	2225000	2004000	3011000	2921000	2256000	2483000	2260000	2581000	3922000
Com_328_pos	5,6-Dihydro-5-Methyluracil	Nucleotide And Its Derivates	901100	850600	796900	1067000	926800	1030000	928500	1190000	1000000	808800	1278000	1084000	1067000	817700	477800	927500	592200	618900	649900	411800	561100	1408000	604200	714200
Com_347_pos	α-Nicotinamide adenine dinucleotide	Nucleotide And Its Derivates	424100	233300	189200	471800	709800	429900	334500	445000	548400	294100	340400	396000	409400	271400	373200	327500	523700	585600	699000	842700	734000	755300	882300	608300
Com_356_pos	Guanosine 3',5'-Cyclic Monophosphate	Nucleotide And Its Derivates	172000	133000	183200	78650	91660	73640	79500	145500	81410	86410	113700	102100	209700	204500	109500	41420	122400	65190	114600	128600	143000	75090	76040	39720
Com_362_pos	β-Nicotinamide Adenine Dinucleotide	Nucleotide And Its Derivates	6518	5669	4987	8323	5682	2051	3499	5013	2993	12250	5993	4924	3729	3958	4443	7540	5543	7846	5286	2426	14920	6858	3026	7873
Com_380_pos	7-Methylxanthine	Nucleotide and its derivates	4804	4030	3784	4681	2423	4274	4142	4076	4360	1415	3731	5180	2793	3575	13210	8451	4017	6156	3874	5076	2484	9920	3840	3653
Com_386_pos	Purine	Nucleotide And Its Derivates	147300	196100	148400	82200	57430	59410	90740	61270	92070	150400	140900	164900	90050	63690	57170	182700	87470	97640	131100	54380	69850	196000	129600	139500
Com_396_pos	5-Methylcytosine	Nucleotide And Its Derivates	34240	38780	28540	52910	55780	49360	46400	34360	33270	38680	45130	34130	40330	27470	33740	52060	36950	47250	37420	38740	50290	53100	54530	54110
Com_409_pos	Thymidine	Nucleotide And Its Derivates	110000	150700	126600	259100	247400	260700	263800	435700	365500	236100	315700	259900	97600	149200	80140	270000	195100	266000	332800	350200	318200	308700	294300	405500
Com_413_pos	Thymine	Nucleotide And Its Derivates	89650	68550	77980	84150	108800	102100	100400	90750	93530	93100	93240	65330	68790	72310	41430	73430	36810	72020	63850	55350	42600	81800	72980	50050
Com_426_pos	Inosine-5'-monophosphate	Nucleotide And Its Derivates	84000	41370	67290	169400	109800	81690	66420	259600	90120	175400	353000	215700	17430	45290	96250	342400	596800	149000	64660	25180	37240	589700	369500	170000
Com_442_pos	Adenosine	Nucleotide And Its Derivates	50660000	43370000	52020000	59270000	55210000	50360000	49270000	67000000	52350000	48180000	54890000	55390000	59610000	54650000	24760000	50700000	28420000	48980000	50630000	61030000	49030000	53050000	47010000	51350000
Com_443_pos	Adenine	Nucleotide And Its Derivates	1125000	1251000	1425000	1420000	1272000	1528000	877000	1779000	1707000	1459000	1202000	1446000	1568000	2578000	709600	911700	1045000	1052000	2639000	1256000	1347000	1158000	1294000	1605000
Com_444_pos	Adenosine 5''-Diphosphate	Nucleotide And Its Derivates	304700	408100	202800	381100	500400	553400	206000	571500	387100	697000	944800	690500	613300	473300	582700	543500	874000	598800	409300	492300	680200	692000	292400	813500
Com_445_pos	Adenosine 3'-Monophosphate	Nucleotide And Its Derivates	715900	575100	727000	1649000	1778000	1286000	853300	3024000	1020000	1927000	5143000	2888000	288000	428800	1379000	4185000	6837000	1633000	610900	367600	243900	7665000	4514000	1662000
Com_464_pos	2'-Deoxyadenosine-5'-Monophosphate	Nucleotide And Its Derivates	114300	119600	84810	166100	152000	183700	135600	105800	112400	136300	201000	213700	146500	118700	133300	254100	166600	178400	112300	141200	167800	177300	196900	211700
Com_465_pos	2'-Deoxycytidine-5'-Monophosphate	Nucleotide And Its Derivates	40170	34600	18950	9398	22440	26270	15490	30530	29650	21580	10340	21460	54680	37670	9507	17870	24580	6865	23560	41210	31950	24902	13500	11720
Com_467_pos	2'-Deoxyinosine	Nucleotide And Its Derivates	3536	9465	1998	8365	6243	4318	2510	5723	4444	4531	8699	8264	2348	7229	2933	6350	8557	3600	1996	4051	7162	7129	4449	6213
Com_468_pos	2-Hydroxy-6-Aminopurine	Nucleotide And Its Derivates	574400	640300	836000	643300	807600	562600	388700	1594000	763100	453800	819800	1009000	678500	454300	587500	550200	420900	873500	922500	1174000	981600	841300	769300	966900
Com_472_pos	7-methylguanine	Nucleotide and its derivates	11340	17880	29500	33580	23900	20970	14270	42570	18490	69160	79320	66090	15800	12130	11800	15750	33000	30750	35950	17960	12750	44800	44960	38590
Com_500_pos	Cytosine	Nucleotide And Its Derivates	535900	654500	519400	417600	388200	379500	551800	594000	567000	476500	443700	411500	447700	539500	334600	382100	231500	339000	464600	464700	475900	400200	321600	455300
Com_501_pos	Cytidine-5-Monophosphate	Nucleotide And Its Derivates	106500	103100	91950	57710	133100	41660	53930	169800	64720	127400	218300	199400	85960	47440	107000	128500	141300	141800	108000	63710	49200	181800	166300	121900
Com_503_pos	Cytidine	Nucleotide And Its Derivates	883300	631600	1118000	499000	677200	728900	1016000	837200	1185000	556800	503100	1017000	881400	878600	330200	347800	207100	253400	588300	466200	519600	421900	437500	851000
Com_512_pos	N6-Succinyl Adenosine	Nucleotide And Its Derivates	705100	769100	572000	947000	777200	872400	679800	589500	561300	721900	689700	808900	355100	492800	433300	584400	402800	679500	490300	579700	808200	745700	368200	657900
Com_544_pos	Hypoxanthine-9-β-D-Arabinofuranoside	Nucleotide And Its Derivates	3392000	3503000	3833000	3426000	4254000	3134000	2236000	5041000	4749000	3743000	3091000	3383000	3031000	6299000	1677000	2707000	2435000	2438000	6460000	3396000	3854000	2707000	3201000	3994000
Com_554_pos	Uracil	Nucleotide And Its Derivates	1582000	1745000	1722000	1111000	1075000	914700	1066000	1309000	1239000	854700	833700	956800	1533000	1473000	707300	636600	366800	731500	1411000	1051000	1040000	743200	608300	979900
Com_555_pos	Uridine	Nucleotide And Its Derivates	982100	1190000	999400	642300	805300	1187000	830400	1182000	704600	573400	889900	515400	1324000	1142000	521700	409400	226900	658600	792000	870000	572800	634000	578600	661300
Com_221_pos	N2-Methylguanosine	Nucleic acid derivative	121000	124700	112400	95570	112800	90430	124000	86390	104200	58370	84230	165300	102900	104700	79540	109900	101100	60460	76530	117900	81800	71120	58420	72070
Com_319_pos	5-Ethyl-2'-deoxyuridine	Nucleic acid derivative	179000	80480	68450	102700	149800	166200	88530	144800	151200	151300	131000	105600	107700	90760	94660	158800	127600	119900	120400	81290	113400	156300	151500	140800
Com_322_pos	5-Methylcytidine	Nucleic acid derivative	70250	59690	56300	73380	82180	103400	88900	80040	77000	90710	76530	85290	51110	62850	53370	78570	78810	81090	57410	55080	76170	93640	63570	70900
Com_397_pos	2-Methyladenosine	Nucleic acid derivative	1269000	1891000	1805000	2117000	1240000	2443000	2282000	1823000	1846000	1786000	1672000	2737000	687600	906800	1314000	1574000	1177000	1821000	1030000	1170000	1470000	1994000	1162000	1753000
Com_398_pos	2'-O-methyladenosine	Nucleic acid derivative	117000	67760	65450	30450	54730	42470	49230	82410	59550	68670	67270	51240	96510	132100	54580	47250	40410	45700	90180	101200	105500	79340	44120	64630
Com_410_pos	Threonyl carbamoyl adenosine	Nucleic acid derivative	117800	100600	79580	162800	157800	169100	134100	90050	97970	128600	157300	153100	116000	128500	109400	173600	111000	182500	80430	103300	173200	214100	137200	151300
Com_415_pos	(2S,3R)-2-{[{9-[(2R,3R,4S,5R)-3,4-Dihydroxy-5-(hydroxymethyl)tetrahydro-2-furanyl]-9H-purin-6-yl}(methyl)carbamoyl]amino}-3-hydroxybutanoic acid (non-preferred name)	Nucleic acid derivative	49460	57490	38420	74120	59460	74720	48820	34220	44400	59740	65570	77190	29930	39870	46840	75990	60440	79810	45780	49230	63690	78280	51110	55190
Com_446_pos	Adenosine O-ribose	Nucleic acid derivative	63870	64030	63330	40950	52650	62650	47280	127900	121000	86270	92160	79490	68889	80046	54665	60560	35090	61340	192900	38490	58510	52610	38910	100800
Com_461_pos	N2, N2-Dimethylguanosine	Nucleic acid derivative	17830	38380	32190	14360	5264	13390	20700	27450	19060	10650	5756	12970	37160	33280	28940	12260	8639	14810	27570	25720	24470	55550	6289	11910
Com_466_pos	2'-Deoxycytidine-5'-diphosphate	Nucleic acid derivative	19160	17980	14340	11400	13300	19600	12150	15880	11830	14790	8357	9247	14600	12940	2477000	2292000	1982000	2054000	1986000	2509000	2569000	2133000	1916000	2590000
Com_473_pos	Crotonoside	Nucleic acid derivative	15750	15430	18190	20880	19760	16890	17570	14640	22740	18850	17600	19780	15450	18780	48320	42220	48930	35330	55900	47110	40420	32160	34920	35350
Com_479_pos	N-(9H-Purin-6-ylcarbamoyl)threonine	Nucleic acid derivative	381900	371700	395700	410100	409800	426000	392300	406900	424400	419800	425300	425300	330300	355900	388000	427100	442800	446000	449600	371300	393500	443700	454700	417800
Com_504_pos	dUDP	Nucleic acid derivative	19110	12790	11330	12070	12000	14580	14060	15050	15590	12420	14130	12960	16120	15820	2514000	2141000	1785000	2043000	1827000	2502000	2555000	2406000	2182000	2518000
Com_47_neg	Cyanidin O-diacetyl-hexoside-O-glyceric acid	Anthocyanins	4214	3253	9318	4390	4652	6194	7968	2907	8167	6955	6403	9524	7966	8860	2837	3619	3768	10278	10070	7820	9522	3381	8459	5735
Com_48_neg	Cyanidin O-acetylhexoside	Anthocyanins	72540	65080	121100	46280	66080	80210	110900	39340	87010	75910	59880	114000	3676	5497	7900	12280	7153	4061	6000	11290	8014	5400	3390	7464
Com_112_neg	Cyanidin 3-O-glucoside (Kuromanin)	Anthocyanins	6385	6024	13000	6692	6233	9618	9591	9279	14060	7379	6825	7633	4817	4539	4676	8935	7653	7975	7191	4849	5847	6411	9608	3919
Com_403_pos	Cyanidin 3-O-glucoside	Anthocyanin	73300	59080	56830	71790	65670	50330	45890	60810	30550	74400	56000	84070	75670	49240	38610	92630	68740	117700	107200	46550	73690	70410	42990	34400
Com_536_pos	Cyanidin 3-rutinoside	Anthocyanin	20890	29920	30150	28280	43050	26520	7071	8659	26230	28850	10480	35910	20890	4130	11720	52110	34330	8464	23300	5379	17830	13070	7058	10680
Com_538_pos	Cyanidin O-rutinoside	Anthocyanin	124100	164500	185800	94830	269600	225300	122000	73980	220800	141900	87860	361800	121900	20830	33710	103000	167800	35740	142500	57650	92740	54230	77070	68900
Com_434_pos	7-O-Ethylmorroniside	Iridoid glycosides	33520	7759	17690	18730	18814	17550	16660	17750	17610	36110	29070	7396	18380	11480	16660	19580	18910	24490	10810	14600	18700	16300	8715	26390
Com_236_pos	Chrysin 5-O-glucoside (Toringin)	Flavone	5557	3740	3425	13490	4323	5169	2992	4632	6849	4565	7773	5084	2963	8181	10700	15340	11080	5995	4579	4053	5782	6238	3176	5220
Com_296_pos	Luteolin 7-O-glucoside (Cynaroside)	Flavone	106300	134400	93158	118600	127700	143567	166800	104400	105800	89110	113000	92250	104600	102200	67460	149900	243300	123200	146600	93360	131300	124400	99290	114700
Com_335_pos	Tricin O-glycerol	Flavone	5090	17380	26260	33430	16720	16650	32310	11910	6270	10340	10050	17950	7981	13950	3541	9904	24160	6541	14310	11650	22100	7276	10230	13910
Com_11_neg	Rhamnetin (7-O-methxyl quercetin)	Flavonol	30160	107200	156800	51760	45890	69530	60300	94340	44030	33250	29350	67440	16890	101600	48740	36110	30830	32980	42960	41340	69090	39920	53460	36600
Com_53_neg	Quercetin 3-O-rutinoside (Rutin)	Flavonol	49300	49170	108300	61920	61940	89020	96470	41050	63850	81160	85900	121500	23380	20770	49720	92950	90670	35810	36450	34730	27120	79130	29050	49370
Com_69_neg	Laricitrin	Flavonol	5860	7120	8746	14970	7334	7760	11780	4738	7572	9736	11920	23920	5540	4549	7216	12850	8279	3731	6892	4213	8153	5568	7761	9339
Com_74_neg	Quercetin 7-O-β-D-Glucuronide	Flavonol	236900	311500	636300	231400	373800	584000	579900	120000	499300	496300	309900	734700	33750	82590	101600	140100	137400	65380	112300	65280	63460	115400	29470	139600
Com_97_neg	Kaempferol 3-O-robinobioside (Biorobin)	Flavonol	85100	68700	159200	76480	83730	101400	120400	51900	102300	94950	78500	151600	25020	25180	32190	53830	41960	29280	30460	28000	25770	36180	22200	36940
Com_99_neg	Isorhamnetin 3-O-neohesperidoside	Flavonol	10600	11610	18330	16790	12480	3893	16360	12370	16140	14110	18160	25330	8688	7022	7871	20070	8348	8429	9300	7060	10090	11570	8711	9314
Com_120_neg	Dihydroquercetin (Taxifolin)	Flavonol	56530	115600	94420	73420	38870	24990	44850	36160	41735	31370	45110	50210	43290	12380	30970	22210	28420	102800	50640	110600	59930	37290	12290	115000
Com_150_neg	Kaempferol 3-O-galactoside (Trifolin)	Flavonol	8911	11690	17220	14370	9384	13100	13760	13330	15080	14710	12460	15710	7328	4660	6306	5323	6968	6628	8205	4283	5511	10070	4570	10240
Com_159_neg	Quercetin 4'-O-glucoside (Spiraeoside)	Flavonol	12500	9346	20490	25770	15520	27260	27930	13070	15900	33010	28800	39210	3745	11730	15260	26580	45020	7592	8853	10210	12090	20050	7584	4208
Com_164_neg	Di-O-methylquercetin	Flavonol	23030	28360	22550	12130	14160	12240	11080	30080	17500	9292	17440	10700	31070	33720	9219	10650	7704	12450	24550	15620	15680	13330	12740	11970
Com_349_pos	Fustin	Flavonol	3649	14500	7484	5413	8855	6978	5574	6791	4628	8909	8244	10570	10580	7221	7617	14700	10620	7672	8708	7912	13700	3828	10540	2633
Com_20_neg	Cynaroside	Flavonoids	11940	13710	27430	14000	16130	13840	17660	13430	20750	21110	17850	23280	6351	8037	8063	9423	8414	7638	4098	7732	6907	10520	4758	10020
Com_30_neg	Methylophiopogonanone A	Flavonoids	18138	9704	36720	18707	12991	12968	14669	11180	15310	30970	24670	24730	25260	22940	28500	41900	20370	28300	16560	21330	19720	57070	35390	44660
Com_51_neg	Acacetin	Flavonoids	3411	4258	3427	3536	3815	7461	3244	3479	3739	3760	3401	3171	7873	2836	2908	3224	3841	4073	3704	2868	3065	2739	3783	3522
Com_209_pos	Kaempferol 3-O-glucoside	Flavonoids	73380	118100	86810	76800	102800	38650	132600	95980	71780	63990	104600	104600	59450	49560	71780	76090	79250	57630	65190	109700	74160	143800	90250	72670
Com_210_pos	Kaempferol-3-gentiobioside	Flavonoids	31710	74030	28410	32310	28860	19990	11950	11000	45700	53290	23580	32520	40760	6217	22170	26020	35180	17450	3808	13060	13070	37150	5533	43530
Com_211_pos	Kaempferol7-O-β-D-glucopyranoside	Flavonoids	98890	86240	104700	48990	75540	123300	139200	65880	136600	86570	80450	170300	54930	30300	75940	80570	108700	22780	49190	57580	59110	78390	34990	68280
Com_212_pos	Kaempferol 3-O-glucoside-2‘-O-rhamnoside	Flavonoids	58090	64170	65640	21260	14040	79240	23100	30150	38870	41790	20170	58830	7156	6747	34460	22210	60240	3508	12720	14920	15900	16430	21930	22610
Com_214_pos	Denin	Flavonoids	310400	187000	175000	701200	580900	189900	380700	181000	339700	804000	570300	311700	103700	142500	107200	611800	463200	169600	81430	241800	74190	307400	234700	315100
Com_215_pos	di-C,C-hexosyl-methylluteolin	Flavonoids	28610	5011	7750	12450	8196	11260	4038	6305	6655	9370	7673	7832	7823	10220	8639	6891	6525	17000	6127	10200	4757	7366	6762	9613
Com_239_pos	methylNaringenin C-pentoside	Flavonoids	7059	3462	7143	5498	8352	4885	5905	5148	3854	3680	2860	5595	7109	4343	4597	5050	7999	5623	5384	3414	9097	3867	3149	6263
Com_258_pos	Chrysoeriol 5-O-hexoside	Flavonoids	9506	9801	3043	5284	13891	12297	8885	8223	9237	9570	10814	33880	3055	54570	8813	4060	10405	2521	18620	4403	4428	4717	32170	6410
Com_273_pos	Rutin	Flavonoids	291100	188900	131900	291500	199500	399300	342800	56390	108400	325300	265500	265200	27920	53610	102000	346000	620000	89880	81420	85370	74600	278400	80310	138000
Com_280_pos	Nobiletin	Flavonoids	16680	15190	12060	12580	11920	7243	14470	11540	6767	12270	13980	17990	20420	22570	20630	15270	17650	9288	23190	13780	13470	14770	14310	16890
Com_310_pos	ISOSAKURANETIN	Flavonoids	255200	270600	294600	280600	348300	297800	300400	351800	265200	317200	311800	323400	215400	248400	315100	376000	502100	428300	272000	297600	280000	373300	301000	389100
Com_321_pos	Biochanin A 7-O-glucoside	Flavonoids	13720	8395	5777	7009	6745	8374	2774	8684	9453	4979	8540	7810	5480	32640	5491	6751	10463	9758	4772	4934	11241	119400	16490	9720
Com_352_pos	Sinensetin	Flavonoids	5534	13340	7135	12810	6138	5070	8822	14160	11810	6259	8410	5960	14080	9250	6003	4928	9249	10300	6469	10070	13910	7362	11740	8401
Com_363_pos	Chrysoeriol	Flavonoids	4989	3444	2764	3452	3433	3258	3128	4232	1724	3406	6600	2491	2402	2709	3666	2998	2839	2871	2995	2929	2794	3159	2070	5601
Com_375_pos	Diosmetin	Flavonoids	3635	1538	9607	1689	3658	2003	880	6053	2228	4043	8682	12240	1832	776	1138	1216	2657	3037	708	921	3932	1097	2607	790
Com_379_pos	Calycosin-7-O-glucoside	Flavonoids	12900	5994	1885	2551	4857	5370	5074	803	6660	5376	7422	13030	2414	13430	7954	6519	8155	7012	844	18320	12770	83510	11120	5430
Com_432_pos	Schaftoside	Flavonoids	3457	5421	15030	3159	9675	10930	6107	4297	6948	2832	4481	16170	6709	2453	13550	9850	6789	8275	5496	4584	14100	5696	4557	11850
Com_439_pos	Naringenin 7-O-glucoside	Flavonoids	144300	132300	83320	164400	187400	193000	83930	120700	108800	150000	200600	186400	92730	107000	90440	153000	113100	153300	55260	109700	143800	209300	133900	108400
Com_440_pos	Narcissoside	Flavonoids	17350	13250	19110	24960	20050	20930	4834	13020	14260	13230	9299	44070	3237	16220	13980	10630	6474	5730	6727	24700	11720	20550	9913	8658
Com_474_pos	Tricin 5-O-hexosyl-O-hexoside	Flavonoids	2701	2000	718	738	3034	1199	2036	309	1454	3457	3516	600	2428	2453	474	1268	266	2854	2722	2965	2638	1310	2440	768
Com_486_pos	methylQuercetin O-hexoside	Flavonoids	14000	35850	14790	23090	15480	14410	33770	10520	9946	13590	31290	36600	15980	18130	29500	50150	13930	12900	26370	20560	20420	7195	32460	19770
Com_507_pos	Quercetin O-malonylhexoside	Flavonoids	124300	107000	207600	111600	117500	157300	291200	46110	160200	192300	181400	297800	15320	26880	29620	31130	64840	27230	17750	22310	21080	31550	8091	26850
Com_509_pos	Quercetin 3-D-galactoside	Flavonoids	38260	69650	82720	103800	57820	104800	57020	67850	38020	70570	69410	84800	69970	72950	104700	132900	193000	120200	76070	74160	64500	150900	63050	32110
Com_510_pos	Quercetin-3,4'-O-di-beta-glucopyranoside	Flavonoids	6048	25920	26410	27340	43800	23040	49650	13260	26510	26460	24650	60440	17270	17890	21920	32810	51170	24120	24190	26880	3588	51840	11870	51220
Com_547_pos	Selgin O-malonylhexoside	Flavonoids	20840	23310	62260	17910	25530	36330	40920	20610	43150	30170	22620	86860	16620	6969	15210	34830	9854	7300	18100	11330	15320	9291	5463	6310
Com_548_pos	Selgin 5-O-hexoside	Flavonoids	4052	2367	3455	4509	2849	4455	2771	2771	5579	3549	2176	3880	2666	4386	4161	2928	3459	4821	5108	2425	4353	4187	4065	3647
Com_556_pos	Luteolin 6-C-glucoside	Flavonoids	3071	3354	2679	2650	6339	9591	4093	2237	7622	10630	3419	4234	12410	3995	2631	5907	2211	5303	6572	5230	2666	5461	3891	1647
Com_559_pos	Luteolin	Flavonoids	2360	2236	10240	1979	1659	2253	5226	4634	3412	2385	4939	3024	9138	6904	1166	1438	2645	936	3406	1490	1927	5590	2112	3623
Com_537_pos	6-C-hexosyl chrysoeriol O-hexoside	Flavone C-glycosides	9736	3797	5471	7482	4493	2734	4081	5355	3811	5385	4254	5603	4738	3453	7262	2517	4747	9023	5318	5457	3011	5024	5180	4066
Com_92_neg	Isosakuranetin-7-neohesperidoside (Poncirin)	Flavanone	75050	65460	126600	67910	73160	92070	108600	44410	86010	82570	78380	134500	21330	16620	25800	33010	35270	24500	23150	21620	24770	31550	19010	31620
Com_94_neg	Pinocembrin (Dihydrochrysin)	Flavanone	20100	6993	13140	21900	18080	20170	17720	7019	8485	16700	33130	21310	10790	13360	26530	30720	25910	23370	27440	25440	21230	23350	24120	18780
Com_151_neg	Afzelechin (3,5,7,4'-Tetrahydroxyflavan)	Flavanone	58910	56340	49330	67680	47740	28440	46100	25940	36150	38610	53100	48830	59630	47180	73570	70530	60670	63270	63340	37470	53270	47950	35330	68610
Com_330_pos	Phellodenol H	Ployphenol	6043	2563	2829	6325	3620	5020	4429	2664	2567	4827	3890	3822	4759	2499	12300	14820	4304	7006	5827	5178	8202	4690	3232	3387
Com_332_pos	p-Coumaric acid	Ployphenol	1123000	1140000	1007000	1850000	1896000	1593000	1893000	2111000	2325000	1963000	3663000	2920000	2908000	3012000	2569000	4505000	3400000	4054000	3743000	2704000	2629000	4361000	4015000	4722000
Com_452_pos	4-O-p-Coumaroylquinic acid	Ployphenol	14280	16320	10890	25260	20780	12630	21500	12110	10640	12300	13170	22870	7901	4807	8026	14370	6927	26470	17910	11860	27070	8512	13210	13780
Com_519_pos	4-Coumaric acid	Ployphenol	11450	21070	19780	13070	39630	32780	29040	18040	40260	20120	59840	45800	18210	18030	24360	27630	20210	28200	9589	18300	35170	37690	35450	16140
Com_529_pos	Benzamidine	Ployphenol	3244000	4890000	3580000	2203000	1508000	1440000	2289000	1886000	2246000	2548600	3279000	3991000	2220000	2034000	1291000	3676000	1821000	2524000	3381000	1533000	2050000	5394000	2888000	3371000
Com_561_pos	N-Feruloylserotonin	Ployphenol	320900	404000	283100	915600	543600	660000	613800	577500	518400	704400	659800	664400	92750	44100	289200	1202000	842600	380000	8981	35130	5015	842000	624300	427900
Com_244_pos	1-O-Caffeoyl quinic acid	Quinate and its derivatives	4360	4216	4614	4986	4256	4948	4803	5644	3989	6717	5654	5098	3023	6250	4861	5281	5299	3084	5911	4563	5924	6455	8402	4569
Com_104_neg	O-Phosphorylethanolamine	Phospholipid	20720	121200	121900	33660	26610	22060	43480	22340	17000	16870	31050	8606	160100	158900	110200	52710	38000	32390	266800	166700	142300	20160	27770	14400
Com_462_pos	Pyrimidine	Pyrimidines	287900	316500	428400	456500	456000	401200	377200	302200	184300	576800	215300	140000	261300	248600	277800	207900	243300	122500	301200	311800	357500	323400	276900	238200
Com_302_pos	δ-Hexanolactone	Lactones	1854000	1159000	1256000	1585000	1466000	1005000	1224000	922700	1270000	1508000	1103000	1070000	2070000	2347000	1392000	1403000	1064000	1698000	2368000	1525000	2173000	1419000	2022000	1098000
Com_327_pos	Acetyl hydroxy tomatidine-O-hexoside	glycoalkaloid	671	1343	668	4678	2680	2000	13750	5295	5807	2695	4459	20100	671	1346	2344	8067	5226	2001	4269	3678	667	16060	14090	38870
Com_68_neg	γ,γ-Dimethylallyl pyrophosphate	Others	215200	206600	465400	438200	220900	164300	117000	721200	379800	411000	315100	227400	242100	215200	315100	301600	333500	288900	272300	173700	188500	530100	276000	512800
Com_73_neg	Allantoin	others	1683000	1227000	1104000	1916000	1467000	1320000	1376000	916000	1131000	1212000	1320000	1066000	1645000	1227000	1844000	2426000	1655000	1739000	1301000	1091000	1970000	2531000	1892000	1883000
Com_148_neg	Dl-Glyceraldehyde3-phosphate	Others	5844	12416	7859	15065	12684	13161	3941	13639	10811	14616	5338	18520	13990	17030	10950	23220	21530	22180	27290	22850	25640	34350	29320	15880
Com_162_neg	N-Acetylglucosamine 1-phosphate	Others	14330	8442	7946	9391	627	10625	9126	6924	4408	9213	3522	4422	28990	30530	36460	51790	30990	42370	45840	52270	43410	29660	29470	27880
Com_171_neg	3-Hydroxy-4-methyl-3-carboxypentanoate	Others	285900	253000	244600	372200	342600	243500	235200	193600	240900	284700	348300	308700	281000	262900	214000	180200	139400	187200	249700	191200	268000	202000	136100	186600
Com_191_pos	trans-3,5-Dimethoxy-4-hydroxycinnamaldehyde	Others	36920	22190	15330	8542	3668	23827	23570	12990	29510	36780	22020	32830	14850	25220	23150	45780	36780	30720	6805	24670	27340	51160	21310	17610
Com_202_pos	Citral,Cis+Trans	Others	5467	10930	9653	3320	2579	2293	4748	4269	4641	3300	10990	4489	2565	2994	7463	4831	8260	5694	6670	5097	8779	5144	4529	3208
Com_222_pos	8-Chlro-1-tetrahydronorharmanone	Others	588800	424200	304200	785300	432000	356000	424600	277500	313600	527200	544000	593500	157900	281800	272700	261500	197900	279500	272900	141700	322100	636000	217500	218300
Com_248_pos	(-)-Norepinephrine N-hexoside	Others	1686000	1664000	1321000	2150000	2283000	2125000	2029000	1595000	1247000	1969000	2323000	2509000	1866000	1557000	2152000	2933000	2262000	2424000	1202000	2041000	2294000	3085000	2299000	2459000
Com_249_pos	(+-)-Baclofen	Others	57970	59890	69910	63270	65990	63280	61450	55290	71480	68660	57530	51450	66060	58280	68790	61120	75110	71190	65820	73940	78750	91620	64970	70680
Com_275_pos	O-Acetyl-L-serine	Others	111000000	115100000	96220000	105200000	79390000	91910000	100200000	71100000	67730000	98860000	97810000	99750000	90060000	75220000	87330000	79930000	71190000	71910000	74120000	70810000	94720000	77310000	71420000	71060000
Com_279_pos	N-Lauryldiethanolamine	Others	111900	155500	108900	129200	191200	200200	183700	108300	120900	160900	167400	172500	110800	102700	92810	147400	168000	128700	65450	94800	145500	141700	147100	101500
Com_285_pos	Apo-13-zeaxanthinone	Others	260300	307500	299300	178700	92330	94420	165400	224200	93950	205500	73620	86120	364500	449500	99360	129100	189300	126300	173300	154300	163900	47660	363100	207000
Com_290_pos	trans-2-Hexenal	Others	809200	665200	626600	604600	660600	909000	704400	653900	841900	836800	669900	611700	810100	658400	629800	739300	735800	735300	610400	910400	870600	898400	590300	641700
Com_294_pos	Urea	others	1668000	1586000	1017000	1293000	1255000	1281000	1334000	1100000	1184000	1283000	1193000	1288000	1231000	1023000	1190000	845500	925200	827100	969200	1035000	1078000	830600	779600	924600
Com_297_pos	O-Phosphocholine	Others	42370000	46570000	50120000	40670000	37380000	43070000	35060000	54970000	39550000	42830000	48810000	41120000	50490000	47220000	37030000	31200000	29490000	32340000	47060000	36810000	37850000	42260000	37970000	47930000
Com_314_pos	DIMBOA glucoside	Others	2972000	1762000	1650000	3584000	3103000	2944000	2276000	2223000	2715000	3439000	4843000	4661000	669100	692200	566200	911600	867900	1029000	526800	688800	812900	1828000	1058000	1014000
Com_326_pos	Acetylcholine	Others	1212000	953800	975000	1341000	1130000	1074000	1298000	1003000	1062000	1369000	1290000	1093000	469500	372100	380000	549000	398800	439600	341000	485300	446000	548600	428500	375300
Com_329_pos	Biliverdin	others	2864	5962	3343	765	2010	748	3015	3858	2365	3007	3146	4505	2510	3698	3320	1837	2730	5562	12930	10620	5918	2705	1179	4673
Com_338_pos	1,N6-Etheno-2-Deoxy-Adenosine	Others	14590	9177	5221	6560	10100	6295	6090	5349	5958	6122	5396	7060	5285	5697	10630	4153	14100	6735	5720	13520	13430	21310	7601	7955
Com_341_pos	Tuberonic acid hexoside	Others	32350	34290	7083	38760	22400	53680	16880	21440	23840	19510	25180	32700	26670	34760	33250	38580	54800	41300	61110	40920	37410	68470	72900	100400
Com_357_pos	Viscumamide	Others	15300	17260	11280	14910	18590	17420	18220	17620	17820	17390	16850	16260	20010	25910	15310	10410	19430	16030	19800	22250	18140	9570	20720	16400
Com_364_pos	Chinese bittersweet alkaloid II	Others	6697	6760	4121	9392	6865	3024	7173	7354	8543	13180	5100	12750	8601	7537	7971	6329	6296	14410	10210	9390	5865	16430	19780	2473
Com_395_pos	Lycoperodine	Others	46330	46180	16980	48880	24880	41680	41660	46050	21600	44860	36240	49100	41420	36640	27430	57840	24210	36300	61750	34870	30460	87690	21260	31450
Com_407_pos	Arabidopyl ketoadipic acid	Others	10850	13470	14450	12640	7413	9287	7819	9639	8944	12960	9647	11960	12510	15800	15820	10150	14570	8256	24220	22130	15880	6949	12910	16190
Com_408_pos	Arabidopyl shikimic acid	Others	93950	112000	72080	251500	137100	175700	150600	141300	137200	205900	170600	191900	24920	10280	82710	349800	207500	113500	3092	13830	21480	228800	156700	102300
Com_412_pos	(S)-(+)-2-(anilinomethyl) pyrrolidine	Others	2220	4627	3973	4697	4596	4504	2887	1793	3165	4593	4305	5081	1763	5864	4045	4936	7528	8009	7339	4811	3509	5244	4685	3802
Com_416_pos	(+/-)-alpha-Lipoamide	Others	247600	244500	165600	288300	89770	154100	305800	66340	115300	289900	216000	362600	76100	119300	181000	380600	71570	228500	81570	51570	182300	495600	125400	119900
Com_417_pos	(1S,2S)-Nicotine1-oxide	Others	4741	9691	8149	8269	11270	8287	5924	7044	10570	10460	7548	8637	8381	5216	11870	8277	12720	10710	8142	9741	5219	8948	16710	3260
Com_425_pos	iP9G	Others	121700	147300	176800	3184000	1191000	1794000	707700	713900	887300	3104000	3119000	2968000	120600	185400	259600	2443000	1009000	986300	666100	787400	537600	3277000	2655000	2659000
Com_433_pos	Sattabacin	Others	81160	91450	56310	96580	109500	95190	101600	86970	60530	81360	104400	120700	36780	36890	43590	79810	46130	70720	46940	52710	42330	69380	40060	54020
Com_524_pos	5-Sulfanyl-1-pentanesulfonamide	Others	12840	13950	9532	10470	8750	3913	3525	12360	7248	9293	70860	9902	6041	6943	31990	9178	58390	13000	50120	43140	40250	33350	34410	24800
Com_527_pos	5-Hydroxymethylfurfural	others	211100	74010	94550	268300	191900	193400	236500	160200	123800	225000	295600	223600	172200	67740	100500	235400	239700	215700	69690	110400	151300	249500	167100	172700
Com_532_pos	p-Nitroaniline	Others	730400	521600	410200	669700	763800	542900	614500	511300	434800	628500	736000	620200	724300	683200	890100	798900	670800	827700	629000	551100	890100	712400	721700	840100
Com_535_pos	Roseoside	Others	8295	6519	7306	13730	15000	10410	11340	6487	7019	10030	7333	14350	9495	13040	6974	14620	12550	16190	7400	9115	9018	14230	10810	10200
Com_558_pos	Epigoitrin	Others	15200000	17650000	14450000	14040000	13330000	11870000	15990000	7533000	9557000	12620000	6268000	9991000	7420000	10290000	9544000	8515000	3940000	7024000	8199000	4852000	13480000	9236000	8441000	10880000
Com_564_pos	Nicotianamine	Others	36230000	33600000	31860000	30150000	26700000	27830000	31200000	24150000	24480000	29950000	21400000	27590000	38720000	43230000	35730000	33690000	21850000	40260000	50120000	37300000	51680000	32620000	34250000	45430000
Com_566_pos	Rhodomyrtone	Others	103000	100900	94480	90510	92650	96700	88670	101600	89790	100600	98390	111900	107800	110200	1286000	1321000	1000000	981300	979000	1292000	1219000	1089000	1102000	1365000
Com_102_neg	1-O-beta-D-Glucopyranosyl sinapate	Hydroxycinnamoyl derivatives	5717	6231	4986	9530	7236	7732	7732	4122	4868	6928	7255	7932	3889	7407	9016	11470	7584	7586	8514	4049	8080	7820	8317	3693
Com_140_neg	Caffeic acid O-glucoside	Hydroxycinnamoyl derivatives	89700	75540	70330	75530	97460	90060	117300	27120	42500	125000	108500	104100	53450	37730	56790	55980	74820	70480	73680	58940	98880	80990	66500	64930
Com_16_neg	D-(+)-Malic acid	Tca Cycle	22750000	17140000	12780000	12940000	15710000	9773000	13100000	13100000	12060000	17670000	13680000	14930000	17180000	9972000	8792000	6595000	13660000	11150000	13990000	17040000	17620000	9850000	12960000	12730000
Com_44_neg	Fumaric Acid	Tca Cycle	1444000	1074000	870300	639100	714600	528300	780600	853500	706600	765100	617900	637700	1307000	758200	701700	489500	1034000	854900	1019000	1358000	1303000	693100	884600	884900
Com_56_neg	D-Malic Acid	Tca Cycle	32870000	24730000	18170000	15170000	18830000	12310000	17400000	18700000	16560000	20130000	16670000	18570000	31030000	17130000	15690000	11360000	24230000	19060000	23740000	32180000	33420000	15610000	20900000	20040000
Com_72_neg	A-Ketoglutaric Acid	Tca Cycle	54870	35880	50700	32910	30330	27820	59100	63940	50540	43430	25600	23730	92170	63220	73350	194400	105900	141800	128200	157300	147900	207300	163300	165200
Com_108_neg	Cis-Aconitic Acid	Tca Cycle	1041000	386500	285200	83270	154500	129300	228700	231100	226700	91090	78010	51270	1035000	941500	809800	548300	1066000	842500	1238000	743300	1193000	784700	622300	384800
Com_152_neg	Pyruvic Acid	Tca Cycle	3989000	2889000	3126000	2061000	1815000	1754000	2288000	2977000	2538000	1746000	1930000	1615000	5851000	5493000	3994000	3800000	3574000	4117000	6806000	5222000	5437000	3666000	4350000	4010000
Com_167_neg	Malate	Tca Cycle	96420000	72780000	55890000	51170000	66120000	39460000	53530000	59800000	47140000	72760000	62860000	60360000	91950000	52060000	46200000	32040000	69970000	54520000	69810000	89560000	93970000	44020000	60430000	56420000
Com_269_pos	N-hydroxy tryptamine	Tryptamines And Its Derivatives	9856	27280	39370	26295	29174	53130	25693	20560	23880	28895	32440	53900	46640	27088	26670	36350	31680	21950	19840	18370	35290	22340	29310	20560
Com_34_neg	Pyrroloquinoline quinone	Alkaloids	7060000	7442000	7186000	8219000	8401000	7838000	7314000	7535000	7673000	8364000	7890000	8552000	34140000	27610000	22940000	21930000	27250000	6397000	25180000	23880000	18750000	6479000	6532000	6727000
Com_126_neg	2-Hydroxyadenosine	Alkaloids	154800	171900	311600	151400	248600	196700	80070	584000	266900	119600	322900	269500	149200	84060	113000	88500	64880	229500	357200	339200	271100	197900	177400	384500
Com_179_pos	Phellodendrine chloride	Alkaloids	15540	24020	10990	21490	17120	12890	26790	14870	13610	16320	11490	14100	22950	27750	24560	11770	18330	19990	24100	22630	25600	21730	14620	16390
Com_234_pos	β-Nicotyrine	Alkaloids	1049000	1096000	749700	1260000	364600	694000	1332000	294700	503000	1183000	977600	1498000	359600	554500	758500	1751000	296500	977600	340800	241900	857300	2068000	563400	568800
Com_247_pos	Stachydrine	Alkaloids	1126000	486400	398900	468300	213000	195800	254100	941900	411100	166700	590700	556400	311800	260800	113100	92830	198100	148700	270300	194300	168900	112300	208200	246000
Com_287_pos	Topotecan	Alkaloids	541700	465000	489600	447800	1289000	618000	1344000	401500	470700	481100	441700	633300	524600	482900	458000	551600	499900	1511000	499800	592600	486800	386900	338400	394300
Com_317_pos	Neotuberostemonine	Alkaloids	6000000	6094000	5551000	5662000	16420000	7418000	16360000	4015000	5277000	4527000	5625000	7277000	5878000	5503000	5248000	5256000	5737000	18190000	5468000	5759000	5480000	4830000	3635000	5261000
Com_334_pos	Phellodendrine	Alkaloids	13550	9436	5650	8818	8784	8791	13670	11050	13790	11820	9519	8283	9781	7172	2627	13570	2937	6385	8094	10030	15160	5363	5924	10640
Com_336_pos	Swainsonine	Alkaloids	862300	676200	668700	606900	610600	528800	447400	546100	569300	866400	451000	591500	701300	745900	702600	633200	437900	928200	1087000	806100	1041000	356700	626200	545400
Com_337_pos	Betaine	Alkaloids	8883000	6334000	4978000	2391000	2915000	3378000	2509000	7798000	3809000	2085000	4908000	4812000	3089000	2879000	3942000	3365000	2866000	4219000	3249000	3140000	2147000	3528000	2184000	2345000
Com_342_pos	Tryptamine	Alkaloids	4892000	3455000	4094000	7261000	7656000	5911000	6804000	5461000	6698000	6367000	7556000	6083000	6072000	5360000	6549000	8585000	7560000	8989000	6864000	6802000	8039000	8557000	8268000	7186000
Com_344_pos	Trigonelline	Alkaloids	30120000	45110000	35960000	34400000	36470000	36390000	35570000	30820000	35640000	28890000	33950000	31230000	62090000	53520000	52880000	57860000	52650000	50260000	46050000	47290000	52160000	48680000	44460000	53350000
Com_477_pos	Gramine	Alkaloids	4398	9164	5584	3015	15030	5036	8316	4766	6307	3115	9968	3799	2818	7127	3426	5672	3015	6466	4711	1734	11850	11460	2789	9514
Com_523_pos	4beta-Hydroxy-11-O-(2'-pyrolylcarboxy)epilupinine	Alkaloids	20460	14600	10950	7166	15830	10680	13920	20020	18750	10260	14700	15550	18800	24980	8045	8920	28510	10850	13500	9710	11010	10910	8275	11540
Com_563_pos	Dendrobine	Alkaloids	4155	4765	3547	4272	2201	4131	3042	3212	2957	3684	3960	4646	4928	6193	6115	2757	4714	2082	10110	6059	5651	2481	4106	4705
Com_499_pos	Cytisine	Alkaloids and derivatives	272400	281700	280800	270700	419000	292900	208300	411400	529000	199800	194900	278100	237800	240500	398700	287400	292200	300100	739800	394400	18220	435600	272600	651600
Com_551_pos	Scopolamine	Alkaloids and derivatives	7226	6674	18870	10110	24790	12140	23500	20140	15050	17030	33880	13980	9313	20660	32020	53180	58900	22350	15910	26780	10010	57210	19080	49950
Com_10_neg	N-Acetyl-L-methionine	Carboxylic acids and derivatives	4331	5042	3943	2454	3303	2725	3278	4694	3142	2267	3200	1711	11100	11060	6172	5703	7251	9401	13210	9995	10300	7540	6145	4920
Com_55_neg	L-Arabitol	Sugar Alcohols	28910	17398	21761	13920	21000	15790	23040	19260	20230	7277	14670	13230	62500	35600	53000	50920	38520	21590	20410	63950	54350	27790	29650	17560
Com_458_pos	D-Arabitol	Sugar Alcohols	312800000	307700000	275100000	315600000	257900000	267900000	290900000	157400000	206000000	276300000	199600000	225300000	139100000	156800000	187600000	200500000	100200000	134600000	139700000	78540000	160400000	225200000	138300000	197900000
Com_494_pos	D-Sorbitol	Sugar Alcohols	386600	206500	173200	405000	382900	327600	394800	299800	265200	353000	445100	379500	289300	154800	157400	399700	412600	346800	187100	207300	367500	521800	248000	228300
Com_552_pos	Maltitol	Sugar Alcohols	5792	14600	10850	24430	7542	11130	8663	13180	11750	17910	16810	13280	4974	13230	20110	42110	24470	13070	8442	5667	14460	21220	17280	24040
Com_553_pos	Maltotriitol	Sugar Alcohols	17000	20580	15000	464200	102400	224600	22780	50130	27970	913600	1112000	962200	12360	6448	17180	245700	163900	165700	36270	38370	27350	737200	463500	814200
Com_2_neg	1,6-Anhydro-β-D-Glucopyranose	Carbohydrates	168000	159600	150500	203800	127000	119600	144900	171500	147400	154500	148800	120000	238900	207300	153300	247700	172600	199000	261000	203700	222400	243300	230500	196700
Com_4_neg	L-Gulonic-γ-lactone	Carbohydrates	8684	5484	8111	7773	7122	5381	7817	5747	7606	7301	8422	11657	13220	16890	12100	12065	11080	12100	17850	16430	8023	13340	9608	9406
Com_7_neg	Raffinose	Carbohydrates	3761	9254	7261	94120	121600	68500	13660	30630	4999	569800	1232000	1025000	7830	4047	7728	158400	167300	134900	22450	22080	23780	793600	693800	644000
Com_14_neg	Inositol	Carbohydrates	415300	426300	843800	926400	1294000	665500	861700	1225000	666500	503480	816600	533900	853400	896600	731900	1044000	640300	1007000	1195000	1159000	911800	776800	425700	956700
Com_17_neg	D-(+)-Glucose	Carbohydrates	50460	95810	124600	211000	79010	103200	156500	143200	59120	335600	150800	339300	94940	164200	127500	746300	330000	376400	305100	249300	264100	1034000	579000	660800
Com_18_neg	D-(+)-Galacturonic acid	Carbohydrates	22820	56803	51832	56361	52233	37973	57506	24840	42680	46423	47706	48878	123800	106900	94310	82360	23540	85126	144200	68220	97490	25600	53540	21090
Com_19_neg	D-(+)-Cellotriose	Carbohydrates	1194	6641	18041	34580	7151	33280	15930	6892	5236	75330	64300	161700	1173	3122	2674	26020	14710	24440	11710	21070	5359	113200	63510	68010
Com_22_neg	s7p	Carbohydrates	9685	21522	43150	32470	67570	24136	23787	25921	23541	28762	18240	36150	38050	28140	30320	35740	29325	32826	62260	20930	15930	50671	106200	39790
Com_33_neg	D-Fructose-1,6-biphosphate	Carbohydrates	45900	100200	59270	47170	71460	46250	51540	111100	100100	62460	102300	70470	63450	103700	46490	95120	90670	156200	74090	68140	115700	123300	75270	197800
Com_39_neg	DL-Arabinose	Carbohydrates	1997000	2599000	1868000	1719000	1407000	1067000	1197000	1550000	1036000	1143000	1530000	1396000	4416000	3614000	2751000	1430000	1786000	2962000	3165000	4100000	4916000	1589000	2351000	2280000
Com_40_neg	D(+)-Glucose	Carbohydrates	134300	143900	104200	219500	270400	165000	216900	149200	234000	274000	127500	217000	296600	130600	55580	401900	263100	381600	361900	338900	352300	359900	224100	290600
Com_57_neg	D-Mannose-6-phosphate	Carbohydrates	47720	40060	30610	56460	132600	49300	57620	136200	411400	31410	74610	50130	174900	32240	22060	53540	56830	140750	66620	356500	196100	418500	64630	65950
Com_58_neg	D-Tagatose	Carbohydrates	141900	137200	190800	164800	176500	116800	194000	215900	172900	113500	122800	117400	374200	396800	306800	472300	388200	425800	504900	527400	416400	225200	273300	297200
Com_59_neg	Dulcitol	Carbohydrates	22840	18210	14470	23250	17620	4246	17810	19910	18820	13580	23220	11290	37900	19880	27660	40880	40270	36550	32660	22180	24500	47670	25150	29310
Com_60_neg	D-Sedoheptuiose 7-Phosphate	Carbohydrates	18420	47130	105500	80330	39660	73670	106500	139300	235900	263000	171900	350400	135100	148400	97710	113900	75500	345100	73080	234700	196900	447900	411700	230300
Com_62_neg	D-Xylose	Carbohydrates	675400	836300	294300	565500	484700	356100	153400	499200	311000	439600	551100	485100	1445000	1200000	823100	580900	633200	1053000	960900	1229000	1481000	509000	743300	845100
Com_63_neg	D-Xylulose	Carbohydrates	1120000	271100	243200	738900	2206000	1512000	888700	1151000	733900	1252000	2310000	2121000	1486000	1607000	1658000	2121000	3069000	2615000	149200	1139000	1294000	2649000	2497000	1494000
Com_78_neg	Fructose	Carbohydrates	30580	42740	24890	104700	102200	117400	107100	173100	92640	79920	66350	99080	137900	142500	92750	364000	207400	148400	139500	164900	218900	321900	648700	428200
Com_79_neg	glucose-1-phosphate	Carbohydrates	143500	157900	151000	200400	156000	229300	169100	187200	159400	180200	204500	134400	113700	138300	151000	211700	156800	194200	185900	165400	181500	241600	232800	213500
Com_83_neg	2-Deoxyribose 5'-phosphate	Carbohydrates	91500	77600	51550	83000	58560	67030	69050	56840	54190	63990	59600	53570	60300	50530	55190	97440	59250	82430	50270	55600	62990	84380	64910	91300
Com_88_neg	D-Glucuronic acid	Carbohydrates	265100	141400	157600	107100	86562	64830	104100	131700	115100	83485	79264	87310	201600	173200	156800	87170	117200	109600	259300	139100	157400	64940	117000	89370
Com_98_neg	D-Glucose 6-phosphate	Carbohydrates	762900	427500	900700	1402000	1204000	440600	1390000	3192000	1984000	1147000	956600	1298000	897700	415000	707600	1761000	1425000	1576000	2224000	2115000	805600	2302000	2203000	2394000
Com_100_neg	D-(+)-Sucrose	Carbohydrates	556800	832600	619300	52150000	15050000	29850000	9975000	8805000	10550000	61790000	54620000	51890000	331500	408300	1530000	40440000	14030000	19470000	8683000	8242000	9376000	58600000	40870000	49990000
Com_105_neg	D-Fructose 6-phosphate	Carbohydrates	302400	439600	415800	796600	514700	606400	609000	1405000	911400	465100	826800	645600	421400	481400	307400	715500	561500	816400	972200	907700	744800	990600	868900	999500
Com_127_neg	2-Deoxyribose 1-Phosphate	Carbohydrates	104300	95630	64440	90360	66860	47400	57520	48050	48370	51120	42300	38850	62410	53590	69060	81950	66350	96780	51080	64860	85830	87040	73480	70530
Com_128_neg	D-(+)-Glucono-1,5-lactone	Carbohydrates	16420	10010	10110	15440	12470	13130	8412	5742	7228	6888	4459	6705	10020	18140	9959	23960	18280	17180	23760	17320	22520	8434	37020	10210
Com_135_neg	D-sedoheptulose-1-7-phosphate	Carbohydrates	119900	95860	97590	291300	225100	236500	232700	300900	174600	250100	320600	265000	154800	83690	83490	383800	285200	366000	311100	177200	171400	495800	324000	428600
Com_136_neg	D-Glucose	Carbohydrates	13580	23340	13520	37200	32030	24790	18880	58010	48180	39730	66070	47590	97640	200700	68770	250600	221300	638500	160500	175300	206000	512600	209800	293800
Com_139_neg	Ribulose-5-phosphate	Carbohydrates	134500	153800	156800	169100	198000	170600	207500	265600	179400	133500	196200	196700	131800	125700	127800	241800	226700	271600	217800	191300	192000	268900	223300	319300
Com_142_neg	Galactinol	Carbohydrates	1447000	1981000	1544000	89980000	28330000	56010000	20410000	15940000	21470000	103700000	96380000	79540000	903900	996600	4233000	80450000	30010000	41220000	17970000	20150000	20320000	114100000	77350000	91320000
Com_156_neg	Trehalose	Carbohydrates	790800	1215000	1027000	72840000	22120000	42440000	13820000	12490000	15630000	70790000	75800000	63320000	442600	525200	1884000	43200000	15430000	21580000	10100000	9122000	9553000	63240000	47920000	54820000
Com_163_neg	Glucarate O-Phosphoric acid	Carbohydrates	76410	58540	57720	77870	92180	57520	96840	153700	87970	107600	82470	79410	86840	94850	74420	189800	95520	136200	179400	147400	152700	248300	219400	240000
Com_172_neg	β-D-Lactose	Carbohydrates	146100	222600	178200	17820000	4820000	9162000	3001000	2465000	3353000	17400000	16100000	14250000	101000	126700	487300	11890000	3398000	5051000	1755000	2340000	2473000	18700000	11050000	12730000
Com_243_pos	Sedoheptulose Anhydride	Carbohydrates	347000	291600	178300	342000	426900	447200	359900	254700	342600	282700	390800	324400	204200	287300	223200	353000	302300	255700	232700	187700	235100	355800	244100	165800
Com_257_pos	Glucosamine	Carbohydrates	58410	96490	91110	78550	54000	34430	67390	63050	96400	65210	57870	77540	73690	88500	64890	40100	93640	78660	47610	60060	70010	45740	54180	67720
Com_291_pos	β-Gentiobiose	Carbohydrates	53730	70380	73060	120500	56950	94870	43480	63400	66160	98610	76240	82440	62220	83260	99080	109300	41430	70560	85990	105600	99500	84050	115700	139900
Com_384_pos	Sucrose	Carbohydrates	26059	9104	8280	232100	99250	388300	34320	42010	88190	437600	210200	135400	16959	2236	8379	107000	169900	17500	16500	38800	15760	1111000	205800	448800
Com_498_pos	D(+)-Melezitose	Carbohydrates	170500	185900	160700	10940000	2162000	4982000	521700	1100000	727100	19050000	21190000	22580000	157300	206900	340300	5374000	2208000	2737000	381500	753100	476400	21110000	11340000	12180000
Com_569_pos	delta-Aminolevulinic acid hydrochloride	Carbohydrates	331500	593700	374700	222300	160300	125600	251300	201100	295500	373000	272300	461900	387100	207300	146900	394000	209700	240600	436700	260700	272800	383600	291400	292300
Com_75_neg	Ribose 5-phosphate	Sugar Acids And Its Derivatives	9661	40550	26480	24490	10730	14310	36990	53060	30420	13840	23370	25940	61650	25690	28190	243800	179500	84440	190700	149100	148300	130900	92440	126600
Com_133_neg	D-Fructose-1,6-bisphosphate	Sugar Acids And Its Derivatives	57850	42120	30040	196900	116800	108900	86370	97320	66050	39410	140100	137900	94850	105100	68340	72080	97550	156600	146600	128200	182700	129800	135500	222600
Com_345_pos	β-Carotene	Terpenoids	9289000	8431000	8355000	9094000	9221000	8665000	9089000	8615000	8942000	7991000	8902000	8838000	8589000	9208000	9299000	8864000	8672000	8873000	9322000	8082000	9575000	8946000	8371000	8788000
Com_405_pos	Artemisinin	Terpenoids	127800	109600	117400	97990	145100	94470	114200	102600	96920	77110	130000	98090	128500	96430	119800	83950	69360	119000	132800	105000	99660	104800	85230	101300
Com_406_pos	Aristolone	Terpenoids	1409	2803	3904	2281	3477	3370	3790	6792	4913	7785	3359	4028	5135	1716	7266	3758	3735	5871	3338	8570	3536	13240	2496	3511
Com_469_pos	Nomilin	Terpenoids	996	3377	1539	2023	4989	6370	1940	2437	1003	6272	2238	2539	3323	1329	3575	2196	2956	5879	2002	6004	1691	1825	2695	4944
Com_231_pos	Polygodial	Terpene	73050	62380	27080	24430	45620	26960	27053	20870	26886	23230	48480	27240	26880	11920	30310	28760	20480	40480	16200	38830	15140	30853	19650	28730
Com_232_pos	Polypodine B	Terpene	43720	40230	39100	689200	184500	411300	285700	202800	163600	594100	665800	625500	26550	32130	45720	223800	233600	199500	164700	157500	189800	304900	239100	268100
Com_240_pos	18-Nor-4,15-dihydroxyabieta-8,11,13-trien-7-one	Terpene	33200	24530	18580	53380	72250	81070	38870	35310	39340	25330	70860	70240	11790	6567	31340	28510	31190	17060	4478	15870	26420	43320	25060	39100
Com_374_pos	Diosgenin	Terpene	793800	872900	801700	771600	762300	791900	718500	803600	772400	791800	769600	802500	868300	938000	12380000	11920000	9726000	9485000	9382000	12190000	13040000	12020000	9546000	11900000
Com_490_pos	Kolavic acid	Terpene	99300	126000	84440	284000	152900	202500	159800	150200	154700	223000	187800	229000	30130	14490	84310	391900	215300	110500	21070	40080	14460	238200	184200	103000
Com_534_pos	Phytocassane E	Terpene	7894	1539	4281	2435	6547	3061	4924	2234	3991	8260	6490	10090	3179	3346	3990	1991	2730	2736	4021	4310	2011	2147	3365	2035
Com_508_pos	1,2,3,6,7-Pentamethoxyxanthone	Ketones	3209	2020	1901	2177	1844	1194	1383	2467	1903	2008	1443	2150	1732	1935	975	1891	1757	1792	1428	1453	1401	3226	2329	2273
Com_32_neg	Nicotinamide-N-oxide	Vitamins	1778000	1796000	1487000	1363000	1178000	1167000	1579000	990500	1251000	1325000	1016000	979200	1039000	1206000	1026000	1565000	822400	1388000	1259000	1200000	1274000	1238000	1158000	1431000
Com_160_neg	Vitamin D3	Vitamins	12490	13330	17230	18380	14640	19530	13110	16700	20570	15080	18650	18050	18070	14580	10220	29320	18290	16300	11120	22360	21340	21740	21580	18690
Com_174_neg	Pyridoxal 5'-Phosphate	Vitamins	45300	34800	65530	59120	46900	52140	40540	49380	52840	38920	70430	69260	51770	39570	38460	62000	62800	55050	63670	52830	64070	62180	75990	51260
Com_218_pos	Biotin	Vitamins	55930	61590	36610	31530	32550	44640	44600	49010	47350	52420	39710	27980	47460	67480	45560	39170	45080	51890	48310	50250	31360	41700	44190	60550
Com_282_pos	Nicotinuric Acid	Vitamins	88460	83290	80080	56420	39780	62830	58430	81130	78740	36640	39440	52820	120400	130100	24430	42210	26640	44970	46820	44780	45000	81450	47680	69130
Com_283_pos	Nicotinic Acid	Vitamins	1290000	962300	1090000	2323000	2322000	2083000	1773000	1639000	1714000	2025000	2477000	2279000	1232000	1530000	1515000	2207000	2054000	2321000	1630000	1594000	2033000	2624000	1841000	1683000
Com_309_pos	Isonicotinic acid	Vitamins	30360	48250	29130	5945	15080	19300	13180	21601	26970	28090	13380	43270	27280	7325	57890	19610	11970	10440	57530	20640	39350	23410	26570	16010
Com_383_pos	Pyridoxine	Vitamins	119400	176300	107400	96630	109800	113700	220300	147000	94360	76070	105100	138000	207600	131600	175300	254100	174200	151600	94110	178900	165700	192300	145300	123600
Com_411_pos	Thiamin	Vitamins	536000	883900	600400	724400	538000	136200	50770	263400	300700	538000	345900	449000	884900	1048000	757300	711200	554300	687400	1044000	528700	974400	460000	379900	478500
Com_447_pos	Vitamin B2	Vitamins	552300	695200	608600	141300	400200	214200	368500	544800	350000	66740	209200	213200	1193000	1167000	450300	152600	188600	810100	1226000	963000	1184000	222800	465300	866700
Com_449_pos	Niacinamide	Vitamins	1000000	1225000	1076000	1595000	1560000	1630000	132600	1108000	1229000	1564000	1997000	2567000	873200	2086000	577600	1285000	1035000	1221000	880500	1009000	1188000	1920000	1529000	1781000
Com_489_pos	L-Ascorbate	Vitamins	164700	152300	75430	161400	156100	174500	150300	161900	115400	130600	149500	143200	158300	159000	146400	181000	184100	168800	141600	161400	132400	156200	146800	160600
Com_491_pos	Riboflavin	Vitamins	133500	153400	131400	32840	81630	53810	93510	113300	90780	16220	57960	27670	278100	239200	110300	31870	41050	212100	302800	224500	217100	62230	112900	211600
Com_496_pos	D-Pantothenic acid	Vitamins	291200	367100	213100	384500	165600	169900	222700	127000	178600	145100	290300	162200	712300	684000	757000	748700	522100	665400	798900	586000	820000	557700	550500	592700
Com_37_neg	Formononetin 7-O-glucoside (Ononin)	Isoflavone	5780	6231	8662	8005	6881	5463	7981	5869	8089	10130	7833	9943	6827	7637	10930	7749	8207	9098	7278	5915	7482	7917	8181	6425
Com_271_pos	Ononin	Isoflavonoids	6839	8908	3514	7318	53520	23290	4598	4250	3371	6755	19760	18480	2554	20190	4040	3081	1644	3434	8133	2526	6632	10260	2928	1395
Com_456_pos	Daidzein	Isoflavonoids	4273	9653	3370	7551	8509	6881	5582	4987	4102	6354	14450	16290	10060	17750	14410	16530	7037	11030	2493	10760	13590	11260	18200	9742
Com_457_pos	Daidzin	Isoflavonoids	9695	8696	7646	6313	18100	14480	3306	5820	5665	6342	4172	11350	3099	14460	7680	9779	9314	9405	3172	9718	9895	8029	8391	9137
Com_475_pos	Glycitin	Isoflavonoids	7150	7933	6410	6424	9284	5750	5720	3760	7033	5257	9104	17140	3302	11800	4658	8024	7720	5518	6928	4565	5332	14010	10960	5752
Com_15_neg	Indole-5-carboxylic acid	Indole And Its Derivatives	110000	81790	77540	53380	46940	35600	45060	50660	44550	52940	43160	37680	203500	184800	100600	111600	105800	153400	206100	140900	195200	132400	149400	121500
Com_145_neg	3-Indoleacrylic acid	Indole And Its Derivatives	21930	25640	15070	23340	10570	16910	24060	12320	14360	24360	21410	32670	11360	14180	18380	35510	9287	25590	10080	7360	18710	40460	13840	14850
Com_354_pos	Serotonin	Indole And Its Derivatives	700900	702800	622300	731000	469200	526200	593700	208000	346600	524700	362000	415100	234000	247400	337000	323900	171700	205300	265200	169700	276900	413100	238800	321300
Com_378_pos	Indole-3-Carboxaldehyde	Indole And Its Derivatives	1003000	1084000	673000	1159000	337500	628400	1184000	252900	497800	1192000	860100	1407000	311900	508500	707300	1605000	292900	895700	384100	223800	822100	2080000	643300	551400
Com_428_pos	Indolelactic acid	Indole And Its Derivatives	186800	96790	111200	312400	164200	236200	183400	38410	68850	298900	137200	141500	18370	38620	76610	97660	11830	42810	30960	36590	141900	79910	53280	61060
Com_430_pos	Indole-3-carboxylic acid	Indole And Its Derivatives	6942	6276	4459	5049	6381	5220	4891	4078	4323	4009	6658	4018	3922	4589	3613	11730	4518	6291	4938	4196	6157	8722	7951	9351
Com_483_pos	N-(3-Indolylacetyl)-L-Alanine	Indole And Its Derivatives	14880	5169	6847	15780	18980	15140	15520	3164	5597	25400	14320	15370	3667	10630	5025	10580	4765	4554	10120	10350	8783	16410	4409	5890
Com_540_pos	Indole-3-acetamide	Indole And Its Derivatives	15870	17440	13502	8607	14170	26250	12460	8605	17070	15470	15096	25830	25940	17238	12870	14345	10890	12457	14030	9472	12760	26780	10330	15666
Com_1_neg	(Rs)-Mevalonic Acid	Organic Acid And Its Derivatives	189400	166200	188400	125500	119200	101600	141400	209500	180600	97950	158300	110300	391400	447500	302900	362800	378400	400800	602100	445500	443500	405000	363800	350900
Com_5_neg	L(-)-Malic acid	Organic Acid And Its Derivatives	38580000	30050000	22580000	21400000	27610000	18120000	21550000	24580000	21890000	31870000	27520000	28840000	33780000	19220000	16750000	12780000	25660000	20550000	26050000	33460000	37020000	17640000	23700000	22120000
Com_6_neg	Citric acid	Organic Acid And Its Derivatives	74810000	43210000	42120000	36070000	34660000	34610000	36280000	39450000	37430000	35310000	29830000	22920000	50650000	40700000	40710000	12740000	23070000	22990000	59870000	35640000	45320000	15090000	23590000	19200000
Com_9_neg	L-3-Phenyllactic Acid	Organic Acid And Its Derivatives	20190	16410	9334	17860	11930	10550	18990	11110	11210	11000	3376	16700	20490	18880	16330	17080	4444	26370	18240	22210	26030	20850	20660	14520
Com_13_neg	β-Hydroxyisobutyrate	Organic Acid And Its Derivatives	3304	12096	12603	12579	11673	13555	10868	5764	13498	13918	11873	20140	25410	13846	12430	17070	21050	25980	17230	19130	17540	24190	6772	12220
Com_21_neg	G6P	Organic Acid And Its Derivatives	848000	950100	828900	2033000	1642000	1935000	1638000	4029000	1594000	1543000	2132000	1461000	935400	1275000	593000	1570000	1637000	2002000	2467000	2023000	1908000	2579000	2604000	2711000
Com_23_neg	2-Aminoethanesulfonic acid	Organic Acid And Its Derivatives	7033	7600	11037	12780	7550	7096	9844	7562	7212	9322	9706	13706	15670	6811	8604	11920	20200	15410	6607	14950	8045	9432	7862	6014
Com_26_neg	2-Methylglutaric Acid	Organic Acid And Its Derivatives	114900	67250	93670	169500	167800	197200	196700	199400	163400	256700	227600	192400	89820	126200	92430	323000	200200	284900	182700	212500	189400	376500	326700	390500
Com_28_neg	2-Isopropylmalate	Organic Acid And Its Derivatives	23680000	16470000	24060000	44260000	41660000	31800000	34560000	33250000	37310000	34120000	43030000	36220000	36590000	29700000	44670000	58830000	48040000	60080000	46490000	41100000	53110000	56280000	52380000	49410000
Com_29_neg	Methylmalonic Acid	Organic Acid And Its Derivatives	409300	425900	347300	211900	193800	196500	285200	311100	239400	204500	181400	163800	638100	575600	444400	456300	454700	356100	755400	552700	603400	421000	453100	442400
Com_36_neg	D-Xylonic acid	Organic Acid And Its Derivatives	1207000	1047000	686100	511000	376500	321800	534900	524500	409900	491000	194800	292900	1637000	1580000	1312000	1280000	896800	1378000	1184000	1419000	1912000	1132000	994400	994600
Com_38_neg	L-(+)-Tartaric acid	Organic Acid And Its Derivatives	5208000	6990000	4630000	4659000	3014000	2182000	2897000	3769000	2433000	1464000	3277000	3095000	12100000	9886000	7179000	3588000	3550000	7896000	8800000	11020000	13080000	3351000	5735000	5580000
Com_41_neg	Suberic acid	Organic Acid And Its Derivatives	159900	86700	112400	84640	69570	63670	90150	82490	93190	92700	72920	66990	139700	111000	117400	60760	110200	157900	146900	120700	162000	103700	110300	60060
Com_43_neg	Isocitrate	Organic Acid And Its Derivatives	17110000	5883000	5194000	1983000	1698000	1929000	3635000	3805000	3028000	1965000	949600	974800	19530000	13980000	13840000	4513000	7313000	7104000	22440000	11510000	15380000	4180000	6259000	4457000
Com_54_neg	L-Lactic Acid	Organic Acid And Its Derivatives	16020	4998	13624	11405	10814	12334	4631	12194	11828	11630	11714	14371	43520	24310	7324	14420	20760	25990	22600	37540	43980	6475	19858	14776
Com_70_neg	Adipic acid	Organic Acid And Its Derivatives	138800	93880	116700	214100	237100	248800	213400	278900	214800	321700	289800	287500	96420	86840	107900	459600	319400	374900	255500	256700	232700	436400	417500	416700
Com_71_neg	2–furanoic acid	Organic Acid And Its Derivatives	2024000	1196000	1073000	693000	618600	678600	853700	827200	810300	663500	494600	381300	1350000	1122000	1107000	424500	644100	651200	1627000	1000000	1247000	579600	718300	586000
Com_76_neg	Lactic acid	Organic Acid And Its Derivatives	263700	164900	123200	64450	84130	54770	111900	118600	96690	21990	58020	41250	310000	186200	159500	129300	256500	203800	199700	281200	326800	176200	188700	170400
Com_77_neg	Oxaloacetate	Organic Acid And Its Derivatives	784600	734800	712200	538000	439400	474500	546000	888200	892800	573800	631100	486700	1556000	1064000	660200	478200	750900	557000	1760000	1391000	1154000	509900	887000	840600
Com_81_neg	Citramalate	Organic Acid And Its Derivatives	169400	30400	78470	18690	52110	16620	45290	76730	35220	15250	13250	20700	280600	233400	260600	119400	170600	205000	315900	288700	330200	204300	181800	138400
Com_84_neg	5-hydroxyhexanoic acid	Organic Acid And Its Derivatives	258700	268200	230300	151100	112900	137300	200200	88090	61410	104800	47470	68560	243200	285100	287500	245500	125300	153000	264600	196000	222300	276000	140500	197300
Com_91_neg	Pheophorbide A	Organic Acid And Its Derivatives	171500	196200	153000	160700	117800	44470	98140	108500	108300	252400	135800	216500	500000	327100	346300	141500	212100	211700	496600	257300	231400	68690	178900	174000
Com_95_neg	Aminomalonic acid	Organic Acid And Its Derivatives	594200	798400	549300	548600	424800	507800	606300	427200	417700	525200	406500	523900	596300	535700	540400	732300	437800	744900	687900	736300	704700	603500	482300	719700
Com_101_neg	Phosphopyruvic acid	Organic Acid And Its Derivatives	92750	129500	128700	210000	110300	104400	120600	121800	114800	106900	60640	109700	136900	150600	164600	172400	151900	285100	231300	329000	372700	111800	164000	256800
Com_103_neg	Palmitic acid	Organic Acid And Its Derivatives	153800	151100	142000	120400	118300	121500	133500	132900	124300	121700	123900	116500	196400	213600	207900	194000	183900	202100	219900	224500	206700	191200	173900	178500
Com_115_neg	Citraconic Acid	Organic Acid And Its Derivatives	855700	457600	442900	315500	278100	307500	393200	352400	362300	307300	235300	193100	721400	654900	591600	382500	521600	508800	785400	515100	638500	445800	548500	401400
Com_116_neg	Hydrocinnamic Acid	Organic Acid And Its Derivatives	319700	419400	303700	265800	191200	142900	205000	240100	152200	181700	176900	168300	752900	544200	422600	199700	215100	468000	522600	619200	694800	192200	303100	355800
Com_117_neg	Hydroxycitric acid	Organic Acid And Its Derivatives	252600	277700	394300	329400	104500	140800	267000	213700	210300	187200	307800	197300	122500	76280	35680	38660	79370	64870	37530	87450	91830	88520	63520	56030
Com_118_neg	Homogentisic Acid	Organic Acid And Its Derivatives	5505	8915	15970	7999	10989	12525	11120	5901	5259	14312	14159	16472	25270	26440	28710	38410	13730	25210	24100	29910	25970	24800	22930	23080
Com_122_neg	Dihydroxyacetone phosphate	Organic Acid And Its Derivatives	7197	9557	12664	13598	13361	14256	12835	11122	6668	14672	18386	20434	9652	13900	11565	22980	15700	17160	20220	13960	18190	25060	3493	13110
Com_124_neg	2-Hydroxyisocaproic Acid	Organic Acid And Its Derivatives	36460	58540	46730	50880	22900	24050	40580	30910	38050	37830	19440	23690	37190	36880	45970	35780	19270	27230	60490	53010	66160	40120	18630	53900
Com_125_neg	2-Hydroxybutanoic Acid	Organic Acid And Its Derivatives	68300	41990	51580	47890	33330	32100	53060	45200	47290	33780	35310	29680	107700	77310	64660	72910	59820	64510	104100	82040	84930	73460	60500	76490
Com_129_neg	Shikimic acid	Organic Acid And Its Derivatives	72905	14840	20970	28440	13810	6518	19290	77220	30820	51805	7777	42060	97210	123500	58910	113700	83150	162100	226200	114300	141300	77270	123000	108400
Com_132_neg	α-Benzylsuccinic acid	Organic Acid And Its Derivatives	25900	40700	22270	23340	31410	26870	40080	53430	23300	30240	12920	18520	72210	36730	34790	30300	24030	12880	83440	36350	29350	47990	62230	57950
Com_138_neg	Α-Hydroxyisobutyric Acid	Organic Acid And Its Derivatives	56030	35810	40280	23760	14260	19700	30140	5744	33590	11000	17480	14950	114000	76040	70310	39060	68670	62830	72960	76930	79290	58460	70310	56300
Com_143_neg	3-Methyl-2-Oxobutanoic Acid	Organic Acid And Its Derivatives	10440	4416	13090	11910	3172	3140	2322	2007	7859	3884	4158	3863	27870	28540	23620	24980	23880	25550	31200	37140	17480	47340	42030	33390
Com_144_neg	3-Hydroxynaphthalene-2,7-Disulphonic acid	Organic Acid And Its Derivatives	185800	342700	155700	184600	64780	39900	133000	51020	60760	57030	56440	67740	194300	258700	146900	171100	97400	215900	217300	283900	279100	158500	178600	264100
Com_146_neg	4-Hydroxy-2-Oxoglutaric Acid	Organic Acid And Its Derivatives	6303000	5411000	5504000	5315000	4719000	5512000	5362000	6593000	5811000	4673000	5514000	5233000	9374000	8649000	8193000	8618000	8028000	8824000	8963000	8776000	9126000	7722000	8084000	7227000
Com_153_neg	Glutaric Acid	Organic Acid And Its Derivatives	128900	103500	96270	91310	6767	18070	24760	100500	63790	90436	81076	87823	417300	280300	137500	111500	156500	116200	534300	353000	303200	103500	202400	177200
Com_154_neg	Malonicacid	Organic Acid And Its Derivatives	94790	72850	77440	54264	19140	21280	51050	44180	39670	19450	15560	10800	116500	137200	104000	55410	88050	68310	119400	111500	135600	62680	65530	80410
Com_158_neg	2,3-Dihydroxybenzoic acid	Organic Acid And Its Derivatives	6528	10014	12721	16048	14266	14683	12765	18830	9084	15668	17542	19260	11870	29670	12650	33560	33130	29050	39140	22950	31990	18470	21420	20120
Com_161_neg	Oxoadipic acid	Organic Acid And Its Derivatives	55190	53450	42390	52470	53770	41530	41930	50680	49730	46440	40110	40810	82880	63090	62630	52150	52480	67850	77400	84470	71730	59880	70210	60830
Com_169_neg	3-Hydroxybutyrate	Organic Acid And Its Derivatives	227300	188000	158200	89480	79590	68900	132500	98620	94240	80080	61370	54950	250900	208100	199400	103600	159400	138500	219500	240700	236100	107000	117100	163000
Com_170_neg	3-Dehydroshikimic acid	Organic Acid And Its Derivatives	57420	48490	73160	46140	60970	31020	35730	118600	81500	74390	81710	93870	179100	223900	79870	129100	94550	166400	312200	108500	134000	94640	153600	143400
Com_177_neg	Argininosuccinate	Organic Acid And Its Derivatives	13190	114367	111529	81400	36790	126355	174400	324900	125585	294000	84170	242700	104600	143015	55790	96360	173300	278400	175169	181200	157500	122900	104800	351700
Com_184_pos	2,6-Diaminooimelic Acid	Organic Acid And Its Derivatives	304700	522600	248800	236600	234800	342300	207800	258300	190500	220000	210300	293500	140200	226400	157700	214700	179200	149200	147400	148600	154500	336500	150400	180700
Com_192_pos	trans-3-Indoleacrylic acid	Organic Acid And Its Derivatives	10870000	11840000	7377000	12840000	3842000	7670000	11920000	2757000	5127000	13310000	8693000	14940000	3279000	5332000	7952000	18560000	2854000	8757000	3435000	2182000	8980000	22620000	5805000	5427000
Com_197_pos	N,N-Dimethylformamide	Organic Acid And Its Derivatives	306510	848400	234400	228700	367200	365100	356000	238270	282800	270200	307600	276100	273000	199200	325600	323700	294000	109600	157900	251030	332200	232000	383300	339600
Com_199_pos	Palmitoylethanolamide	Organic Acid And Its Derivatives	12300	14260	13290	16740	13380	15490	14300	19230	14050	15800	14870	15280	13880	14440	13930	11990	12210	15680	13430	15380	13500	13890	16220	13990
Com_217_pos	Caffeic Acid	Organic Acid And Its Derivatives	189100	194200	150600	294800	318300	221200	198000	181700	163600	320600	314500	307600	332100	299800	349800	474900	967600	425700	329800	269900	396900	515100	327500	524300
Com_219_pos	N1-Acetylspermine	Organic Acid And Its Derivatives	30120	45340	31240	28280	30580	34730	38280	29240	23850	29090	30520	33340	27530	38810	22750	50490	30060	27710	36750	24690	35930	43580	22020	39620
Com_223_pos	3-Methylcrotonyl Glycine	Organic Acid And Its Derivatives	55910	66430	67750	92540	69780	68150	70620	60850	81490	58970	62340	60030	62460	65570	41310	80700	59040	49070	62420	69220	66390	64310	65590	54580
Com_266_pos	N-(2-Hydroxyethyl)iminodiacetic acid	Organic Acid And Its Derivatives	2022000	1958000	1659000	1893000	1345000	2084000	1800000	1163000	1339000	1521000	1299000	1985000	1526000	2403000	2619000	2037000	1588000	2964000	3979000	3347000	4204000	1342000	1857000	2443000
Com_281_pos	Kynurenic acid	Organic Acid And Its Derivatives	69500	81820	56070	104800	21510	61100	104000	19130	28790	91240	80860	113200	21420	39300	68730	148000	34090	102300	46680	12980	81800	180000	56920	64120
Com_300_pos	γ-Aminobutyric Acid	Organic Acid And Its Derivatives	203100	299400	168000	342300	205600	239000	199800	166400	153200	293100	269900	234200	289400	301500	182800	364700	266600	238400	232100	164100	158700	375800	152300	261700
Com_339_pos	10-Formyl-THF	Organic Acid And Its Derivatives	4226000	4303000	2780000	4537000	4292000	3824000	4468000	3458000	3269000	4205000	4772000	5100000	4409000	3858000	4562000	6101000	4609000	5482000	3605000	4695000	5471000	6424000	4889000	5577000
Com_358_pos	α-Keto-γ-(methylthio)butyric acid	Organic Acid And Its Derivatives	5154000	4521000	5918000	4593000	5136000	4608000	5749000	6870000	5044000	4916000	4838000	3750000	4247000	5775000	4464000	4793000	5672000	4619000	4128000	3819000	5268000	6310000	4244000	4719000
Com_376_pos	Dl-2-Aminooctanoic Acid	Organic Acid And Its Derivatives	166500000	121600000	124900000	119800000	115700000	68280000	105900000	76390000	98620000	135700000	81070000	85900000	208700000	204700000	110000000	85220000	68540000	143300000	179000000	139300000	151200000	96150000	149800000	84760000
Com_381_pos	Subericacid	Organic Acid And Its Derivatives	6247	8603	4749	18030	12460	17090	9437	8720	11030	17020	5632	11760	3165	13590	3621	16160	12550	12670	6100	3959	6084	4708	5956	15120
Com_429_pos	Indole-3-pyruvic acid	Organic Acid And Its Derivatives	9248	6845	3478	6224	4474	3656	4136	5241	4895	5187	6969	4367	4811	5861	3114	6301	8930	3395	3942	7984	8892	55930	7927	9561
Com_451_pos	Phosphoric Acid	Organic Acid And Its Derivatives	56540000	86510000	68000000	75280000	39160000	39030000	47210000	40210000	34820000	48500000	40030000	48750000	64810000	82800000	92320000	59520000	51870000	74870000	86900000	96890000	97870000	35460000	54620000	76160000
Com_460_pos	D-2-Aminobutyric Acid	Organic Acid And Its Derivatives	6170000	6939000	6432000	7297000	6818000	6691000	5909000	6890000	6265000	6237000	7139000	6747000	8126000	7405000	6345000	6948000	6136000	6515000	7950000	7192000	7328000	6807000	6877000	7506000
Com_463_pos	2-Aminoethylphosphonate	Organic Acid And Its Derivatives	12190	7706	7625	8134	10040	7030	5925	6121	8209	5559	7675	8186	6531	5192	7831	9245	14070	6762	4376	9232	10570	8780	9018	13200
Com_505_pos	Xanthurenic acid	Organic Acid And Its Derivatives	61110	65560	44630	79700	18800	41830	79250	13780	33480	79160	58210	83450	19510	34920	43640	119800	21180	54990	22140	17360	51310	125700	30430	33610
Com_511_pos	Pyrrole-2-Carboxylic Acid	Organic Acid And Its Derivatives	80580	135600	86190	43200	63090	39240	91450	80440	83620	74820	68200	81530	89330	103400	32970	42980	22200	37790	89620	77920	92980	49840	28220	66100
Com_520_pos	4-Guanidinobutyric Acid	Organic Acid And Its Derivatives	979500	823300	830500	1088000	929600	1114000	1072000	851500	823500	1118000	900600	822100	314700	260700	260900	395100	229400	304400	269800	387300	291000	396600	334000	323000
Com_522_pos	4-Acetamidobutyric Acid	Organic Acid And Its Derivatives	199400	202600	75540	162000	165200	233400	161800	120400	185000	281200	85520	113600	105022	31330	99832	92230	121528	114422	106917	74570	42970	127900	63270	47570
Com_530_pos	Azelaic Acid	Organic Acid And Its Derivatives	17160	8001	14220	10770	18620	11490	28700	21670	15470	35480	24940	16050	32970	22720	22790	31370	18570	25960	17800	18720	19760	26700	30460	17860
Com_533_pos	Pipecolinic acid	Organic Acid And Its Derivatives	4271000	4827000	5214000	4238000	3206000	3735000	3841000	4640000	3466000	4880000	4498000	4629000	3600000	4844000	2701000	3919000	2914000	3091000	4577000	3243000	3954000	5567000	4161000	5053000
Com_549_pos	Sebacate	Organic Acid And Its Derivatives	5568	5671	2117	3328	2207	2766	4518	2855	3793	4504	4763	3856	2840	3636	3738	4445	2731	6816	4530	6607	2890	4702	5302	1307
Com_134_neg	D-erythrose-4-phosphate	Organic oxygen compounds	59110	53450	65060	103100	60380	69670	70570	127200	79390	68520	79700	73320	72000	72920	63220	123900	102300	120500	121900	99850	113000	100300	112000	137300
Com_176_neg	Sucralose	Organic oxygen compounds	29830	56110	66360	59040	32770	59580	67760	234800	122900	96190	104600	134800	201000	212300	159800	194000	149500	273000	221700	219300	263600	182900	222700	202100
Com_289_pos	Nicotinate ribonucleoside	Organic oxygen compounds	255500	190600	151100	260300	333300	396300	342500	172900	201600	306800	241400	267100	168100	298100	237300	379700	178000	353000	244200	271300	248700	374500	217800	214200
Com_343_pos	Methional	Organic oxygen compounds	2139000	2088000	1971000	2209000	1872000	1883000	1883000	1925000	1748000	2126000	1963000	1997000	2347000	2108000	1998000	2134000	2039000	1785000	2280000	2243000	2505000	2220000	1953000	2377000
Com_485_pos	Muscone	Organic oxygen compounds	335200	346800	362300	342900	391400	364400	318000	302900	384300	368800	389000	374500	333900	420800	363000	373900	375100	321000	374400	387600	314000	365000	364300	416100
Com_50_neg	Biopterin	Organoheterocyclic compounds	81830	63550	44710	77090	43320	41670	56450	23350	29150	45600	28450	38740	60070	61440	65600	96260	55390	70510	51100	54080	114700	107000	68270	61140
Com_318_pos	Neocnidilide	Organoheterocyclic compounds	4490	5208	8006	5113	2683	6571	8888	4063	4178	2684	5127	3890	6572	10140	4920	3605	3153	5137	4748	5682	3361	2667	4520	2858
Com_528_pos	L-Sepiapterin	Organoheterocyclic compounds	6607	18600	24260	9407	7505	17920	6397	30830	29770	15180	6924	4560	7594	23200	55240	45280	31390	37490	34430	7070	21050	28520	10100	11340
Com_24_neg	D-3-Phosphoglyceric acid	Fatty acid	27680	49050	37710	97860	52860	68710	82370	93840	57330	41820	60950	59030	43830	68950	49380	93060	92770	292100	98380	294300	439900	81750	126200	199300
Com_27_neg	2-Methylenesuccinic acid	Fatty acid	9476	15040	15050	12110	6597	8112	14020	25100	26810	10880	24380	3925	47980	28370	14870	13570	18830	13290	60850	53020	28570	14990	30140	24580
Com_52_neg	Sebacic acid	Fatty acid	41730	39100	45270	53120	23770	35840	41750	53040	46140	28760	33670	20880	45740	35920	28730	44000	30090	51130	46370	38490	19170	50490	48430	58020
Com_80_neg	13-HOTrE(r)	Fatty acid	17420	18700	16710	19900	19050	18240	19850	19790	19720	19870	19830	21260	10300	11630	13290	15280	16580	22420	13260	15240	13070	17610	17210	17140
Com_96_neg	Phytanic acid	Fatty acid	5695000	6136000	6580000	6297000	6353000	5835000	5907000	7103000	5974000	5960000	6255000	6198000	3748000	3950000	4514000	4527000	4789000	5607000	5114000	5190000	5336000	5767000	5713000	6147000
Com_111_neg	9,10-EODE	Fatty acid	262600	235200	211100	194800	193900	226600	236400	332000	254000	238000	214400	214200	312300	323600	329500	243900	285400	285600	400400	330000	378500	214600	242800	257400
Com_203_pos	Corchorifatty acid B	Fatty acid	3049	7329	11550	6033	8632	5351	7377	5159	4453	3129	5849	2476	8516	3219	9655	9682	6402	6422	5041	8315	4870	3628	3334	6689
Com_298_pos	LPC(1-acyl 18:3)	Fatty acid	413500	647100	342400	954100	751000	531300	505800	759100	580500	1056000	552100	964900	384500	367100	275300	692600	427200	542800	545200	510600	363500	597400	492200	580900
Com_299_pos	LPC(1-acyl 18:2)	Fatty acid	9497000	12460000	9904000	17710000	10900000	11340000	10450000	17840000	11760000	10450000	9816000	13750000	6896000	10850000	10320000	11420000	9807000	12050000	16690000	11430000	10010000	11880000	11290000	13650000
Com_305_pos	LPC(1-acyl 16:1)	Fatty acid	35330	36520	41680	45680	26960	23130	30690	27640	24680	40560	20140	30740	19580	34200	39410	29460	13550	20960	49490	29420	37040	25550	24590	28240
Com_306_pos	LPC(1-acyl 16:0)	Fatty acid	1518000	2360000	1585000	3541000	2378000	2060000	1679000	3159000	2120000	3498000	2094000	3368000	1578000	1634000	1519000	2888000	1633000	1847000	2086000	1872000	1293000	2238000	1737000	2124000
Com_307_pos	LPC(1-acyl 18:1)	Fatty acid	728200	892900	683000	1541000	627200	1138000	721200	2152000	1024000	1301000	711800	1199000	615000	930200	707300	967100	891100	1016000	1292000	985700	686800	1073000	1449000	1632000
Com_308_pos	LPC(1-acyl 16:2)	Fatty acid	10040	18920	10130	27390	23190	20350	24530	17950	13740	16430	12070	18510	8981	10100	16520	26570	14000	18680	15870	17300	16480	24670	19090	20400
Com_323_pos	9,17-Octadecadiene-12,14-diyne-1,11,16-triol	Fatty acid	7992	8367	7666	8033	8470	7945	8318	7897	8523	6624	6853	7342	9731	11100	10260	11070	9861	9454	11210	10520	10120	8490	9208	10040
Com_324_pos	9-Hydroxy-(10E,12Z,15Z)-octadecatrienoic acid	Fatty acid	156700	170800	176000	124700	92410	62670	85360	233900	91590	74220	102600	103000	215400	216300	60490	48250	47030	72020	145300	77160	83900	53050	69240	78520
Com_340_pos	14,15-Dehydrocrepenynic acid	Fatty acid	643400	1088000	596500	951200	666200	625500	648600	619300	551800	1162000	565200	756300	890900	1049000	262000	359000	249600	888600	848100	801100	790300	774000	463300	1422000
Com_418_pos	Tianshic acid	Fatty acid	16440	32110	20560	15370	11900	11540	16990	24650	19200	9928	21260	9905	36010	22180	8175	6927	4320	16310	15410	25420	24910	17320	10430	11190
Com_431_pos	Octadeca-11E,13E,15Z-trienoic acid	Fatty acid	153140	70830	113400	116400	105500	127400	112400	166985	146400	53190	50720	138900	136600	249400	141200	182280	83060	238800	349300	57920	162700	70290	148900	112900
Com_441_pos	Oleamide	Fatty acid	7494000	7856000	7513000	8295000	8444000	8162000	8328000	7859000	8016000	8062000	7706000	8555000	7869000	7663000	17980000	16130000	17730000	14030000	20820000	16030000	13800000	12980000	14270000	14200000
Com_506_pos	Quinic acid	Fatty acid	209400	129900	60490	133500	111400	114000	39250	298500	68550	108700	66440	57090	44400	199300	82600	245400	67740	118300	278500	60850	174600	70560	120200	67510
Com_525_pos	5Z,8Z,11Z,14Z-Eicosatetraenoic-5,6,8,9,11,12,14,15-D8 acid	Fatty acid	60290	61190	65490	80080	59460	83280	79140	61740	50210	65240	68860	49660	71970	75790	51710	62620	58380	81860	60680	63180	65180	57350	71480	62280
Com_201_pos	Panaxydol	Lipids and lipid-like molecules	251100	518300	285500	643100	243900	349900	249000	186600	222500	598300	305500	487300	369800	434000	646000	489200	498400	317000	655500	471700	625100	274800	416700	651600
Com_207_pos	L-Menthone	Lipids and lipid-like molecules	9123	6760	6040	8126	7179	4449	4411	5664	5877	2752	8406	3314	10000	10090	10350	3931	7232	6397	9709	4590	2908	10310	6357	1764
Com_228_pos	Stigmasterol	Lipids and lipid-like molecules	15230	15830	15350	16310	14770	16210	15740	15510	15330	14230	16460	15190	15860	16690	16970	16030	15930	17410	15300	16140	17090	15900	16500	15730
Com_238_pos	1-Linoleoyl-Rac-Glycerol	Lipids and lipid-like molecules	19590	16264	27190	19220	15872	5074	19710	14300	9602	18100	16770	27470	4879	6701	14330	27710	22290	24920	7679	7623	6304	14310	17860	16060
Com_241_pos	14-Methylhexadecanoic Acid	Lipids and lipid-like molecules	34480	31980	34700	37950	33260	28720	28210	27820	28030	28510	35860	34280	30120	40950	28370	23030	33020	29370	27630	28670	31490	34390	34880	24230
Com_250_pos	(-)-trans-Carveol	Lipids and lipid-like molecules	103100	85610	46390	47460	60230	59000	49180	56140	64740	62080	36800	46840	60140	48020	56450	64140	38420	29520	90370	30680	62250	42390	41270	52810
Com_255_pos	Geraniol	Lipids and lipid-like molecules	6380	15800	5969	12710	3865	2587	6438	4497	4090	4335	8339	3956	6128	8284	7138	4009	7607	2750	10380	2248	11210	5590	3130	5133
Com_260_pos	Methyl arachidonate	Lipids and lipid-like molecules	12830	15700	12950	18450	13890	17440	12670	13150	16560	13050	13450	12810	19150	13310	16620	14380	13500	13510	15070	13830	13220	14300	15050	14160
Com_270_pos	Oleic acid	Lipids and lipid-like molecules	111600	100300	99620	103300	114000	92080	107300	104800	100000	103600	94630	112000	91170	99570	266600	199900	273800	215900	323000	209700	182900	175100	185900	182300
Com_303_pos	L-Mimosine	Lipids and lipid-like molecules	108300	92440	46960	87010	89080	100400	85700	81900	84960	81020	81640	65950	49480	78330	70510	121700	75080	83070	78320	85280	100300	101300	82480	88010
Com_312_pos	α-Linolenic acid	Lipids and lipid-like molecules	7462000	15730000	9423000	20350000	7307000	10170000	7502000	5747000	6720000	19080000	9512000	14880000	10460000	12890000	18930000	14350000	14190000	10470000	20910000	14630000	17930000	8615000	11980000	19900000
Com_348_pos	β-Linoleic acid	Lipids and lipid-like molecules	51280	96480	53620	123000	41270	59390	44170	34830	40200	98250	56820	88670	65880	79190	112400	83610	83050	68220	119900	90460	110100	45730	65440	110600
Com_359_pos	Hexadecan-1-ol	Lipids and lipid-like molecules	117700	131000	131600	112100	110100	105100	121900	107900	96000	118700	128400	110000	135400	116900	112300	141000	111000	97420	125200	142400	117200	98570	113700	115400
Com_366_pos	Cholesterol	Lipids and lipid-like molecules	25240	19920	21070	25160	20030	28800	20500	26800	26330	24720	22090	21360	32690	29760	31140	30660	31740	28670	26290	33810	29880	31750	27580	20150
Com_369_pos	Methyl linoleate	Lipids and lipid-like molecules	144000	172100	136800	83150	99050	66270	54180	205000	101400	63420	104700	84740	199700	213700	71210	28620	43400	76280	128200	105700	98720	51880	52770	63930
Com_370_pos	Methyl linolenate	Lipids and lipid-like molecules	29470	29850	31840	31610	33300	34350	28990	31500	31700	34240	29310	32240	32570	36440	47610	30510	44200	32360	52770	42960	37760	34230	32160	33780
Com_385_pos	Pulegone	Lipids and lipid-like molecules	2251	3150	2636	2903	3114	5074	2135	1556	1665	2088	2221	1354	2609	2837	3768	3860	1532	1912	4624	2915	2592	3823	2380	5680
Com_531_pos	Aucubin	Lipids and lipid-like molecules	8524	8131	3368	18550	5971	9716	2406	11740	8567	3678	24000	14860	7605	4435	8152	12400	13100	7553	2984	10090	8365	19420	13370	3633
Com_541_pos	Erucic acid	Lipids and lipid-like molecules	4601	9442	1404	3875	1764	6446	4960	5100	8107	5243	4089	4249	8228	4630	7242	5728	4220	3081	6755	5951	3926	8176	3585	4773
Com_106_neg	Methyl indole-3-acetate	Phytohormones	132500	128400	161900	174300	152300	155800	94350	180600	95430	175500	202000	118800	72100	145600	154200	234000	152000	175500	155700	144700	162700	150800	194500	269100
Com_119_neg	Salicylic acid	Phytohormones	368400	279500	266800	295500	196300	230000	353400	149000	254000	203000	123200	144100	427700	469600	442200	668200	316100	571800	491000	475500	581000	577200	411900	420800
Com_165_neg	Salicylic acid O-glucoside	Phytohormones	34670	292200	979400	44110	78040	112000	118800	224900	119200	66000	44590	80680	28140	234300	133700	76790	220900	67600	95400	98070	148100	130100	255800	105100
Com_193_pos	trans-Zeatin-riboside	Phytohormones	18660	23550	19840	14030	25730	32120	38040	30620	15930	19400	22500	22450	14460	30120	12760	16380	15550	11890	20970	25470	26390	31240	15090	14740
Com_261_pos	Methoxy indoleacetic acid	Phytohormones	437900	455100	266700	487700	164900	365600	465600	51570	208100	403700	390000	552300	81230	199500	331200	677100	108500	535100	241600	100100	458300	701600	265600	298700
Com_315_pos	Dihydrozeatin (DZ)	Phytohormones	3328	22400	5891	16410	12100	8327	8679	9146	13020	11030	4038	17300	22700	4904	12210	5357	10614	10810	13660	16000	9311	8133	12382	5217
Com_368_pos	Methyl jasmonate	Phytohormones	3247	3931	4294	8122	5896	4071	4458	2784	1819	1932	4212	5399	2553	4014	3218	4200	5000	2466	2940	3365	2794	6469	1916	3234
Com_543_pos	IAA-Glu	Phytohormones	45810	36340	35900	59300	33740	46390	53070	32580	39190	47570	60950	34540	44050	39140	51990	73980	60940	35270	36280	30950	24240	40290	36980	54640
Com_545_pos	IAA-Asp	Phytohormones	1551000	736800	743800	2468000	1518000	2307000	1894000	261400	676800	2855000	1110000	1261000	211800	413300	694500	1042000	140700	566900	245800	361500	1559000	1075000	420800	557500
Com_8_neg	L(+)-Arginine	TCM	123700	172800	72850	78620	31540	54370	91590	33780	34080	37950	4724	9981	104900	146900	185400	82360	85520	21520	104600	62250	144400	249200	15870	121200
Com_188_pos	Ambroxane	TCM	47100	60450	55170	52010	34070	47040	45090	57060	32630	29950	41650	41870	69510	63910	22430	34210	23850	44330	65160	42820	53320	50830	38040	50850
Com_198_pos	Patchouli alcohol	TCM	4601	4875	4615	5981	2552	3167	9439	5294	3225	3999	2835	7309	2808	3233	3169	4835	2059	4658	2418	2252	4154	2983	2049	4978
Com_286_pos	ANGELOL-K	TCM	287800	297600	286900	244900	797900	394300	917800	208800	232800	241400	280400	372900	318300	305300	247900	243700	301900	903000	265900	269200	333900	221700	172000	235200
Com_288_pos	Trachelogenin	TCM	6422	5389	6786	5884	4682	6870	6493	5791	5783	6410	5247	3240	5680	7792	4449	4543	3198	6976	5928	4753	3265	5960	5107	6124
Com_355_pos	Guan-fu base A	TCM	1690	1840	438	705	1826	1622	2128	902	1256	2937	1101	3549	749	719	2451	4985	1472	3332	3020	2620	1430	458	477	916
Com_521_pos	4-Dimethylaminobenzaldehyde	TCM	104500	91590	62470	148700	133400	108700	102800	84900	69370	67640	113400	103600	80330	81530	101500	123900	89550	104700	72500	98930	95430	133800	90140	92640
